1  
2  
3  
4  
5  
6  
7  
8  
9  
10  
11  
12  
13  
14  
15  
16  
17  
18  
19  
20  
21  
22  
23  
24  
25  
26  
27  
28  
29  
30

## **Dissociation of $\beta_2m$ from MHC Class I Triggers Formation of Noncovalent, Transient Heavy Chain Dimers**

Cindy Dirscherl<sup>1,x</sup>, Sara Löchte<sup>2,x</sup>, Zeynep Hein<sup>1</sup>, Janine-Denise Kopicki<sup>3</sup>, Antonia Regina Harders<sup>1</sup>, Noemi Linden<sup>1</sup>, Julian Weghuber<sup>4</sup>, Maria Garcia-Alai<sup>5,6</sup>, Charlotte Uetrecht<sup>3,7</sup>, Martin Zacharias<sup>8</sup>, Jacob Piehler<sup>2,y</sup>, Peter Lanzerstorfer<sup>6,y</sup>, and Sebastian Springer<sup>1,y\*</sup>

- <sup>1</sup>Department of Life Sciences and Chemistry, Jacobs University Bremen, Germany;  
<sup>2</sup>Department of Biology and Center for Cellular Nanoanalytics, Osnabrück University, 49076 Osnabrück, Germany;  
<sup>3</sup>Heinrich Pette Institute, Leibniz Institute for Experimental Virology, Hamburg, Germany;  
<sup>4</sup>University of Applied Sciences Upper Austria, 4600 Wels, Austria;  
<sup>5</sup>European Molecular Biology Laboratory, Hamburg Outstation, Hamburg, Germany;  
<sup>6</sup>Centre for Structural Systems Biology, Hamburg, Germany;  
<sup>7</sup>European XFEL, Schenefeld, Germany;  
<sup>8</sup>Physics Department, Technical University of Munich, Garching, Germany.

<sup>x</sup>Equal contribution.  
<sup>y</sup>Equal contribution.

\* To whom correspondence should be addressed:  
Department of Life Sciences and Chemistry  
Jacobs University Bremen  
28759 Bremen  
[s.springer@jacobs-university.de](mailto:s.springer@jacobs-university.de)  
+49 421 2003243

## 1      **Abstract**

2      At the plasma membrane of mammalian cells, major histocompatibility complex class I  
3      molecules (MHC-I) present antigenic peptides to cytotoxic T cells. Following the loss of the  
4      peptide and the light chain beta-2 microglobulin ( $\beta_2m$ ), the resulting free heavy chains (FHCs)  
5      can associate into homotypic complexes in the plasma membrane. Here, we investigate the  
6      stoichiometry and dynamics of MHC-I FHCs assemblies by combining a micropattern assay  
7      with fluorescence recovery after photobleaching (FRAP) and with single molecule co-tracking.  
8      We identify non-covalent MHC-I FHC dimers mediated by the  $\alpha_3$  domain as the prevalent  
9      species at the plasma membrane, leading a moderate decrease in the diffusion coefficient.  
10     MHC-I FHC dimers show increased tendency to cluster into higher order oligomers as con-  
11     cluded from an increased immobile fraction with higher single molecule co-localization. In  
12     *vitro* studies with isolated proteins in conjunction with molecular docking and dynamics sim-  
13     ulations suggest that in the complexes, the  $\alpha_3$  domain of one FHC binds to another FHC in a  
14     manner similar to the  $\beta_2m$  light chain.

15

## 1      **Significance Statement**

2      MHC class I molecules are cell surface transmembrane proteins with key functions in adap-  
3      tive immunity against viral infections. The spatiotemporal organization of fully assembled  
4      MHC I at the cell surface and its function with respect to trans-interactions with T and NK cells  
5      has been studied in detail. By contrast, the consequences of peptide and  $\beta_2m$  dissociation yield-  
6      ing to formation of free heavy chains (FHC) have remained unclear. We have discovered that  
7      class I free heavy chains form distinct non-covalent dimers at the cell surface rather than non-  
8      specific clustering, and we have identified a dimerization interface mediated by the  $\alpha_3$  domain.  
9      We propose that these non-covalent dimers are the basis of distinct signaling and endocytic  
10     sorting of MHC I FHC. This is to be explored in further work.

11

## 1 Introduction

2 Major histocompatibility class I molecules (MHC-I)\* are central to the immune response  
3 against infections and malignancies by presenting antigenic peptides to T cells (Comber and  
4 Philip, 2014; Kaufman, 2018; Townsend and Bodmer, 1989). MHC-I heterotrimers consist of  
5 the polymorphic transmembrane heavy chain (HC), the non-polymorphic soluble light chain  
6 beta-2 microglobulin ( $\beta_2m$ ), and the peptide (Townsend et al., 1990, 1989). In addition to this  
7 trimer, two more states of MHC-I occur at the cell surface, the ‘empty’ HC/ $\beta_2m$  heterodimer  
8 that lacks peptide (Ljunggren et al., 1990; Sebastián Montealegre et al., 2015), and the mono-  
9 meric ‘free’ heavy chain (FHC) (Edidin et al., 1997; Geng et al., 2018). Since the binding of  
10 peptide and  $\beta_2m$  is cooperative (Elliott et al., 1991; Gakamsky et al., 1996), HC/ $\beta_2m$  heterodi-  
11 mers are conformationally unstable, and loss of peptide leads to the rapid formation of FHCs  
12 (schematic in **Figure 1A**) and to the subsequent endocytic removal of FHCs by a sorting mech-  
13 anism that is not understood (Sebastián Montealegre et al., 2015). For FHCs present at the cell  
14 surface, important regulatory functions mediated by homo- and heteromeric interactions in *cis*  
15 and *trans* have been proposed (Arosa et al., 2007; Campbell et al., 2012), which suggest a  
16 defined spatiotemporal organization and dynamics of FHC in the plasma membrane. Indeed,  
17 clustering and covalent dimerization of MHC-I have been identified using a variety of ap-  
18 proaches including recombinant proteins and live cells (Allen et al., 1999; Antoniou et al.,  
19 2011; Armony et al., 2021; Baia et al., 2016; Blumenthal et al., 2016; Bodnar et al., 2003;

---

\***Abbreviations:** AUC, area under the curve;  $\beta_2m$ , beta-2 microglobulin; BFA, brefeldin A; BSA, buried surface area;  $D^b$ , the murine MHC-I molecule H-2D<sup>b</sup>; ER, endoplasmic reticulum; FHC, free heavy chain; FRAP, fluorescence recovery after photobleaching; GFP, green fluorescent protein; HA, hemagglutinin (tag); HC, heavy chain;  $K^b$ , the murine MHC-I molecule H-2K<sup>b</sup>; MD, molecular dynamics; MHC-I, major histocompatibility complex class I; MS, mass spectrometry; RMSD, root mean square deviation; ROI, region of interest; SL8, ligand peptide cognate to  $K^b$  (single-letter amino acid code SIINFEKL); SMCT, single-molecule co-tracking; SMT, single-molecule tracking; TAP, transporter associated with antigen processing; TIRF, total internal reflection fluorescence; TMD, transmembrane domain.

1 Capps et al., 1993; Chakrabarti et al., 1992; Fassett et al., 2001; Ferez et al., 2014; Lu et al.,  
2 2012; Makhadiyeva et al., 2012; Matko et al., 1994; Triantafilou et al., 2000); these represent  
3 complexes of different and largely unclear composition, size, and type of intermolecular bond-  
4 ing.

5 Recently, we have achieved direct detection of homomeric FHC interactions in the intact  
6 plasma membrane by means of a live-cell two-hybrid micropattern assay (**Figure 1B, C**) (Dir-  
7 scherl et al., 2018): micrometer-sized patterns of anti-hemagglutinin tag (HA) monoclonal an-  
8 tibody are printed onto glass coverslips (Schwarzenbacher et al., 2008; Sevcsik et al., 2015).  
9 Onto these micropatterns, cells are seeded that express two different MHC-I HC constructs.  
10 One construct has an N-terminal (extracellular) HA tag and thus, while diffusing laterally in  
11 the plasma membrane, is captured into the printed antibody pattern. The other has no HA tag  
12 but a C-terminal (intracellular) green fluorescent protein (GFP) fusion domain (**Figure 1B**).  
13 Interaction of GFP-tagged HC with micropatterned HC is detected by an increased GFP fluo-  
14 rescence in the micropattern (**Figure 1C**). With TAP2 (transporter associated with antigen pro-  
15 cessing)-deficient fibroblasts (which cannot transport peptide into the endoplasmic reticulum  
16 (ER)), empty HC/ $\beta_2m$  heterodimers are present at the cell surface. By adding peptide, shifting  
17 cells to 25 °C, or incubating at 37 °C, we therefore can accumulate trimers, HC/ $\beta_2m$  heterodi-  
18 mers, or FHCs, respectively, at the cell surface (**Figure 1B** and described below). These ex-  
19 periments revealed that formation of homomeric MHC-I only takes place in the absence of  
20  $\beta_2m$ , *i.e.*, only between FHCs.

21 We now have uncovered the molecular principles that govern such homomeric MHC-I FHC  
22 association in the plasma membrane. Cell micropatterning in conjunction with fluorescence  
23 recovery after photobleaching (FRAP) was used to probe dynamics, stability, and prominence

1 of FHC complexes. We furthermore directly demonstrate FHC association in the plasma mem-  
2 brane under physiological conditions by using real-time single-molecule tracking (SMT) and  
3 co-tracking. Surprisingly, we find that FHC transiently associate into non-covalent dimers with  
4 lifetimes in the sub-second range. Based on our findings that the HC/HC complexes contain no  
5  $\beta_2m$  and that the  $\alpha_3$  domain of the HC is sufficient for dimerization *in vitro* and in cells, we  
6 propose a molecular model structure of MHC-I HC/HC dimers by *in silico* docking and mo-  
7 lecular dynamics (MD) simulation. Our findings clearly differentiate the cell surface dynamics  
8 and properties of empty FHCs from the peptide-loaded trimers of MHC-I, pointing to the for-  
9 mation of structurally well-defined HC/HC homodimers that may be responsible for distinct  
10 endosomal trafficking and other biological functions previously ascribed to FHCs.

11

12

## 13 **Results**

### 14 *A micropattern assay reveals non-covalent association of MHC class I free heavy* 15 *chains*

16 In STF1 cells, which are fibroblasts that cannot load MHC-I with peptides due to a defi-  
17 ciency in the TAP peptide transporter, incubation at 25 °C accumulates murine HC/ $\beta_2m$  heter-  
18 odimers at the plasma membrane, since at that temperature, dissociation of  $\beta_2m$  and subsequent  
19 endocytosis are inhibited (Day et al., 1995; Ljunggren et al., 1990; Sebastián Montealegre et  
20 al., 2015). When the temperature is shifted to 37 °C,  $\beta_2m$  dissociates to yield FHCs, and lateral  
21 *in cis* interactions between HA-K<sup>b</sup> and K<sup>b</sup>-GFP (both hybrids of the HC of the murine MHC-I  
22 molecule H-2K<sup>b</sup>) become visible in the micropattern two-hybrid assay, where the GFP fluores-  
23 cence arranges in the shapes of the antibody micropattern (**Figure 1C**). When cognate peptide

1 is added to the cells, HC/ $\beta_2m$ /peptide trimers are stable and do not associate with each other  
2 (**Figure 2B**) (Dirscherl et al., 2018).

3 Up to six different MHC-I allotypes are present at the cell surface of human and murine  
4 cells. To date, though, an interaction of different MHC-I allotypes in the same plasma mem-  
5 brane has not been shown. We therefore tested for such heterotypic interactions between  $K^b$   
6 and H-2D<sup>b</sup> (D<sup>b</sup>). Just as for  $K^b/K^b$ , also  $K^b$  and D<sup>b</sup> FHCs (at 37 °C) interacted with each other,  
7 whereas  $\beta_2m$ -bound heterodimers at 25 °C did not (**Figure 1D**). Hence, our micropattern assay  
8 confirmed that formation of heterotypic FHC interactions is possible.

9 We next asked which molecular characteristics are required for HC/HC interactions, and we  
10 first tested whether the HCs are held together by cytosolic disulfide bonds as previously sug-  
11 gested for certain allotypes under oxidizing conditions (Baía et al., 2016; Capps et al., 1993;  
12 Makhadiyeva et al., 2012). We replaced the single cysteine in the cytosolic tail of  $K^b$ -GFP  
13 (residue 332) with a serine and tested for association between this mutant and wild type HA- $K^b$   
14 (**Figure 1E**).  $K^b$ (C332S)-GFP and wild type HA- $K^b$  interacted in over 90% of cells, demon-  
15 strating that cysteine 332 is not required for HC/HC interactions.

16 To test more generally for any disulfide bonding in MHC-I interactions, we immunoprecip-  
17 itated HA- $K^b$  molecules from STF1 cell lysate with anti-HA antibody. By non-reducing gel  
18 electrophoresis, covalent homodimers of  $K^b$  were not observed, while the well-described di-  
19 sulfide-linked homodimers of the human MHC-I allotype HLA-B\*27:05 (Dangoria et al.,  
20 2002) were readily detected (**Figure 1F**). We conclude that the  $K^b$  FHCs are non-covalently  
21 associated and that they do not undergo intramolecular disulfide bonding under the conditions  
22 of our assay.

23 Since the cysteines in the cytosolic tail of  $K^b$  are not required for HC/HC interaction, we  
24 hypothesized that FHCs non-covalently associate via their extracellular domains, and that the

1 loss of  $\beta_2m$  is a prerequisite for HC/HC interaction. As anticipated, a disulfide-stabilized vari-  
2 ant of  $K^b$ -GFP (Y84C/A139C), in which  $\beta_2m$  dissociation is dramatically decreased (Hein et  
3 al., 2014), did not interact with HA- $K^b$  (**Figure 1G**). In agreement with our earlier finding that  
4 covalent attachment of  $\beta_2m$  to the HC also prevents HC/HC association (Dirscherl et al., 2018),  
5 this result demonstrates that HC/ $\beta_2m$  heterodimers do not interact with other HC/ $\beta_2m$  hetero-  
6 dimers, nor with FHCs.

7

### 8 *Free heavy chains associate on TAP-proficient cells*

9 So far, we used TAP2-deficient STF1 cells to obtain homogeneous populations of free  
10 heavy chains at the cell surface. Since MHC-I HC/ $\beta_2m$  heterodimers and FHCs both exist at  
11 the cell surface of wild type cells (Day et al., 1995; Ljunggren et al., 1990; Ortiz-Navarrete and  
12 Hammerling, 1991, p.), we next tested whether FHCs also associate in cells with wild type  
13 TAP function (schematic in **Figure 2A**). Following the 25 °C to 37 °C temperature shift that  
14 triggers FHC formation, we performed the same anti-HA antibody two-hybrid micropatterning  
15 assay with HA- $K^b$  and  $K^b$ -GFP as above (in **Figure 1B and C**). Again, the punctate GFP flu-  
16 orescence signifies the recruitment of  $K^b$ -GFP fusion to the printed patterns of the anti-HA  
17 antibodies, mediated by the HA- $K^b$  fusion. We quantified  $K^b$  HC/HC interaction in STF1/TAP2  
18 cells, which are able to load class I molecules with peptides, over time by GFP fluorescence  
19 contrast analysis between pattern elements and interspaces. Interactions increased in TAP2-  
20 positive and in TAP2-deficient cells with the same dynamics and reached a maximum after  
21 ca. 60 min of incubation at 37 °C (**Figure 2B, C**), with the kinetics likely governed by the dis-  
22 sociation of  $\beta_2m$  from the HC/ $\beta_2m$  heterodimers, which occurs on the same time-scale (Sebas-  
23 tían Montealegre et al., 2015). As expected, HC/ $\beta_2m$ /peptide trimers, stabilized by cognate



1 SIINFEKL peptide, did not show any interaction (**Figure 2B**). This experiment confirms that  
2 HC/HC interactions take place at the surface of TAP2-proficient cells.

3

#### 4 *FHC association slows down cell surface diffusion of MHC-I*

5 Since dimers and oligomers of FHCs have more transmembrane domains (TMDs) than sin-  
6 gle HC/ $\beta_2m$ /peptide complexes, we hypothesized that they should diffuse more slowly in the  
7 plasma membrane (Gambin et al., 2006; Wilmes et al., 2015a). We therefore carried out total  
8 internal reflection fluorescence (TIRF) fluorescence recovery after photobleaching (FRAP) ex-  
9 periments on STF1 cells with HA-K<sup>b</sup> and K<sup>b</sup>-GFP on surfaces with or without micropatterns  
10 (**Figure 2D**) and quantified the recovery dynamics (**Figure 2E**). Diffusion constants of FHCs  
11 (– peptide) were significantly decreased as compared to HC/ $\beta_2m$ /peptide complexes (+ pep-  
12 tide; **Figure 2F**), suggesting that FHCs form complexes. The moderate decreased by ~40% is  
13 in line with the formation of dimers rather than clustering into larger complexes. Since this  
14 effect occurred both in cells seeded on the pattern elements (on pattern) and in cells seeded off  
15 the micropatterns (off pattern), we conclude that the micropatterns are not required for HC/HC  
16 interactions, i.e., that the interactions are not an artefact of the two-hybrid micropattern assay.  
17 This is also supported by the co-immunoprecipitation of MHC-I molecules in the absence of  
18 micropatterns (Dirscherl et al., 2018; Triantafilou et al., 2000). Diffusion constants of  
19 HC/ $\beta_2m$ /peptide trimers on pattern and off pattern were not significantly different, which  
20 demonstrates that the antibody micropatterns themselves do not impede the diffusion of plasma  
21 membrane proteins.

22 In the FRAP experiments, a portion of K<sup>b</sup>-GFP appeared immobile on a timescale of seconds  
23 as evidenced by the incomplete fluorescence recovery (**Fig. 2E**). This immobile fraction is sig-  
24 nificantly higher for FHCs than for HC/ $\beta_2m$ /peptide trimers (**Fig. 2G**). This observation is

1 readily explained for K<sup>b</sup>-GFP bound to HA-K<sup>b</sup> molecules immobilized within micropatterns,  
2 but it is remarkable for the FHCs on cells outside of the micropattern (gray column in **Fig. 2G**).  
3 There, it may be ascribed to the formation of large oligomers, and/or to the association of FHCs  
4 with immobile structures, such as the cytoskeleton and/or due to sequestration in endocytic  
5 membrane compartments (Bondar et al., 2020; Ibach et al., 2015; Mylvaganam et al., 2018;  
6 Vámosi et al., 2019). From the FRAP curves, the exchange rate of the freely diffusing pool of  
7 K<sup>b</sup>-GFP into and out of the bleached regions of interest (ROIs) is obtained through a bi-expo-  
8 nential fit as the slow recovery rate ( $k_{slow}$ ) (**Figure 2H**, solid bars); the fast recovery rate  $k_{fast}$   
9 represents free diffusion (Sprague and McNally, 2005)(see the Materials and Methods). On the  
10 pattern elements, the  $k_{slow}$  of FHCs was much smaller than in cells outside the patterns, sug-  
11 gesting a half-time of dissociation from the pattern-bound immobile associations of about  
12 140 seconds. Likewise, the fluorescence signal of pattern elements in the immediate vicinity  
13 of the bleached region remained unaltered, indicating that no detectable exchange of K<sup>b</sup>-GFP  
14 between the enriched HA-K<sup>b</sup> regions occurs on the second timescale (**Figure 2S3**). This very  
15 slow exchange of K<sup>b</sup>-GFP molecules associated on pattern elements suggests either multiple  
16 association and dissociation events in a small radius due to densely immobilized binding part-  
17 ners, or a very stable association of the immobile FHCs (see the discussion). In conclusion, K<sup>b</sup>  
18 FHCs show reduced diffusion rates on the cell surface, which is most easily explain-  
19 ed by homotypic association.

20

### 21 *Transient FHC dimerization directly observed at single molecule level*

22 We therefore turned to directly visualizing FHC diffusion and interaction in the plasma  
23 membrane under physiological conditions by single molecule tracking (SMT) and co-tracking

1 (SMCT) (Moraga et al., 2015; Sevcsik et al., 2015; Wilmes et al., 2020a). STF-1 cells transi-  
2 ently expressing K<sup>b</sup> with its N-terminus fused to monomeric GFP (GFP-K<sup>b</sup>) were imaged by  
3 TIRF microscopy. The GFP tag was labeled with photostable fluorescent dyes by using equal  
4 concentrations of anti-GFP nanobodies conjugated to either ATTO Rho11 (<sup>Rho11</sup>NB) or ATTO  
5 643 (<sup>ATTO643</sup>NB), with one nanobody binding one GFP molecule, ensuring selective imaging  
6 of K<sup>b</sup> in the plasma membrane and tracking with high fidelity (**Figure 3A**). Imaging was per-  
7 formed at 37 °C to induce formation of FHC in the absence of the peptide, while replenishment  
8 of GFP-K<sup>b</sup>/β<sub>2</sub>m dimers from the ER was inhibited by Brefeldin A (BFA).

9 After labeling with <sup>Rho11</sup>NB and <sup>ATTO643</sup>NB, individual K<sup>b</sup> subunits were observed at densi-  
10 ties of <1 molecule/μm<sup>2</sup> diffusing randomly in the plasma membrane (**Movie S1, Figure 3S1**).  
11 Co-tracking analysis revealed homomeric interaction of K<sup>b</sup> FHCs in the absence of peptide,  
12 whereas these events were very rare for peptide-loaded K<sup>b</sup> (**Figure 3B-D**). As a positive control  
13 for the formation of homodimers, a crosslinker based on the tandem anti-GFP nanobody LaG16  
14 (Fridy et al., 2014), which recognizes a different epitope than the labeled nanobodies, was  
15 added to the medium. While dimerizing of K<sup>b</sup> via the GFP tag resulted in a nominal fraction of  
16 ≈38% (median) co-locomoting molecules, only ≈3% of the FHCs were found associated, indi-  
17 cating weak interaction of FHCs at these low cell surface expression levels of K<sup>b</sup> (≈1 mole-  
18 cule/μm<sup>2</sup> in total, corresponding to <5000 molecules/cell).

19 From the trajectory analysis, we determined the diffusion coefficients of individual MHC-I  
20 molecules by mean square displacement analysis (**Figure 3E, Figure 3S2**). In the absence of  
21 peptide, diffusion of FHCs was significantly slower than in the presence of the peptide. This  
22 decrease in single molecule diffusion coefficients supports interaction of FHCs in the plasma  
23 membrane. A similar decrease in the diffusion coefficient was observed upon dimerization of

1 peptide-loaded  $K^b$  with the tandem nanobody, suggesting that FHCs associate into dimers. In-  
2 deed, largely identical diffusion coefficients were found for the fraction of molecules identified  
3 as dimers by SMCT (**Figure 3S3, Table 1**). Strikingly, the diffusion constants obtained by  
4 SMT for peptide-loaded  $K^b$  and for FHC from SMT are consistent with those obtained by  
5 FRAP experiments under the same conditions (**Figure 2E, Table 1**), highlighting that similar  
6 phenomena are being probed by these complementary techniques. Tracking analysis revealed  
7 a slightly elevated immobile fraction of  $\sim 20\%$  for  $K^b$  in the absence of the peptide compared  
8 to  $\sim 17\%$  for peptide-loaded  $K^b$  (**Figure 3F**). Again, a similar effect was observed for artificially  
9 dimerized, peptide-loaded  $K^b$ , corroborating the dimeric stoichiometry of associated FHCs.  
10 Importantly, the “immobile fraction” in SMT refers to much shorter time and length scales as  
11 compared to FRAP (cf. methods section), and therefore, the absolute numbers are not compa-  
12 rable. Within the immobile fraction, a higher level of FHC was found associated, as compared  
13 to the mobile fraction (**Figure 3G**). Overall, the single molecule diffusion analyses suggest that  
14 FHC dimers have an increased propensity to be immobilized at the plasma membrane, probably  
15 by clustering that may be related to endocytosis. Interestingly, this feature is reproduced by  
16 artificial dimerization of intact MHC-I by a crosslinker, suggesting that FHC dimerization is a  
17 switch regulating its cell surface dynamics.

18 SMCT analysis moreover revealed dissociation of FHC homomers, confirming its transient  
19 nature (**Figure 3B, Movie S2**). We estimated the lifetime of FHC complexes from co-trajectory  
20 length histograms. Fitting of an exponential decay revealed a significantly shorter lifetime for  
21 FHC co-trajectories compared to the average co-tracking lifetime determined for stably NB-  
22 crosslinked  $K^b$ , which is limited by co-tracking fidelity and photobleaching (**Figure 3H**).  
23 Taken together, SMT directly confirmed a transient homotypic HC/HC interaction in the  
24 plasma membrane that leads to reduced diffusion velocity and immobilization, in line with the  
25 FRAP experiments. Since the degree of association was low, and higher-order oligomerization

1 was not observed, we propose that HC/HC interactions are weak and have dimeric stoichiometry.  
2

3

#### 4 ***The $\alpha_3$ domain of $K^b$ forms dimers and is sufficient for FHC association***

5 We next explored the molecular mechanism of HC/HC interaction. Since cytosolic cysteines  
6 are not involved (**Figure 1E, F**) and dissociation of  $\beta_2m$  is necessary (**Figure 1G**), we hypoth-  
7 esized that HC/HC interactions involve the extracellular portion of the HCs. To determine more  
8 precisely which domains are involved, we used STF1 cells in the micropattern assay that ex-  
9 pressed constructs of  $K^b$  that lacked the  $\alpha_1/\alpha_2$  domain. Remarkably,  $\alpha_3$ -GFP showed excellent  
10 copatterning with HA- $K^b$ -RFP (fused to red fluorescent protein; **Figure 4A**). Likewise, HA-  
11  $\alpha_3$  and  $\alpha_3$ -GFP showed a significant copatterning, demonstrating that the  $\alpha_3$  domain is suffi-  
12 cient (**Figure 4B**). Indeed, the isolated, soluble  $\alpha_3$  domain of  $K^b$ , when refolded *in vitro*,  
13 showed (after testing of its folded state by fluorescence spectroscopy, **Figure 4S2**) significant  
14 formation of homodimers in size exclusion chromatography (SEC; **Figure 4C**), while no prom-  
15 inent higher order complexes were observed. These  $\alpha_3$  homodimers were not linked by disul-  
16 fide bonds as shown by nonreducing gel electrophoresis (**Figure 4D**), just like the interaction  
17 of full-length FHC in the plasma membrane (**Figure 1F**). Given the 1:1 peak ratio observed at  
18 10  $\mu$ M protein concentration, a binding affinity of 10 to 20  $\mu$ M can be estimated for this inter-  
19 action. The non-covalent  $\alpha_3$  homodimers were also detectable by native mass spectrometry  
20 (MS) in a concentration-dependent manner, and they easily separated into the monomers when  
21 the collision cell voltage was increased in an MS/MS experiment, suggesting a low-affinity  
22 interaction (**Figure 4E-G, 4S1, Table 2**). These observations suggest that FHC dimerization  
23 in the plasma membrane is at least partly based on the intrinsic affinity between the  $\alpha_3$  domains.

24

## 1 *A molecular model of the K<sup>b</sup> HC dimer*

2 To image one possible arrangement of the K<sup>b</sup> heavy chains in a dimer, we used molecular  
3 docking. A starting geometry was obtained by placing the  $\alpha_3$  domain of one K<sup>b</sup> HC in the same  
4 position as the  $\beta_2m$  in the original K<sup>b</sup> HC/ $\beta_2m$  heterodimer and adjusting the  $\alpha_1/\alpha_2$  superdomain  
5 to avoid sterical overlap. The structure was then energy-minimized and further refined by Mo-  
6 lecular Dynamics (MD) simulations (**Figure 5A**). During MD simulations of 400 ns, no signs  
7 of dissociation were observed, and a stable root-mean-square deviation (RMSD) from the start  
8 structure was reached (**Figure 5S1**). In the model, the  $\alpha_3$  domain of one FHC substitutes for  
9  $\beta_2m$ , binding both the  $\alpha_3$  domain and the  $\alpha_1/\alpha_2$  superdomain of another FHC with a buried  
10 interface area (BSA) of 2480 Å<sup>2</sup>, which is comparable to the BSA of 2740 Å<sup>2</sup> between  $\beta_2m$  and  
11 the HC in heterodimers (**Figure 5B**, bottom), and to other stable protein complexes (Bahadur  
12 and Zacharias, 2008). Similar results were obtained with other arrangements of the two heavy  
13 chains (not shown).

14

## 15 **Discussion**

16 Interactions of MHC-I FHC with FHC of the same allotype, of different allotypes, and even  
17 with other cell surface proteins have been proposed to play an important role in regulating  
18 adaptive and innate immune responses (Arosa et al., 2007; Campbell et al., 2012), but the mo-  
19 lecular principles governing FHC interactions have remained unclear. By combining live cell  
20 interaction and diffusion analysis using cell micropatterning and FRAP as well as SMT and  
21 SMCT, we have shown here that, after losing  $\beta_2m$ , murine H-2K<sup>b</sup> MHC-I molecules at the cell  
22 surface interact in a homotypic and heterotypic manner to form dimers, which are transient  
23 with a stability on the second timescale. The  $\alpha_3$  domains of the FHCs alone already form such

1 interactions, but we do not know whether the  $\alpha_1/\alpha_2$  domain is additionally involved in the FHC  
2 interactions.

3 While we observed a somewhat increased tendency of FHC to form higher oligomers, our  
4 data surprisingly identify non-covalent FHC dimers as the prevalent species at the cell surface.  
5 We analyzed the diffusion properties of FHCs and HC/ $\beta_2m$ /peptide trimers at different cell  
6 surface expression levels by FRAP and SMT. FRAP experiments were carried out at high sur-  
7 face densities, which probably exceeded the typical endogenous cell surface expression levels  
8 of  $10^5$  copies/cell (Spack and Edidin, 1986). By contrast, SMT was performed at densities of  
9  $\approx 1$  molecule/ $\mu\text{m}^2$ , *i.e.*,  $< 5000$  molecules/cell. Despite these differences in expression levels, we  
10 found highly consistent diffusion coefficients  $D$  by both FRAP and SMT, which revealed mod-  
11 erately decreased mobility upon dissociation of  $\beta_2m$  (**Table 1**). However, under both condi-  
12 tions, the decrease in  $D$  was  $\approx 40\text{-}50\%$ , which perfectly agrees with the change in  $D$  upon di-  
13 merizing intact MHC-I by the tandem nanobody (**Figure 3E**). Likewise, we and others have  
14 previously observed very similar decreases of 30-50% upon dimerization of cell surface recep-  
15 tors (Ho et al., 2017; Low-Nam et al., 2011; Moraga et al., 2015; Richter et al., 2017; Váradi  
16 et al., 2019; Wilmes et al., 2020a, 2015a), corroborating that the mobile HC/HC complexes are  
17 mostly dimers.

18 Direct detection of FHC interaction by SMCT corroborated transient, non-covalent dimeri-  
19 zation and only minor clustering into higher oligomers. Estimated lifetime of the non-covalent  
20 FHC/FHC dimer ( $t_{1/2} = 220 \pm 150$  ms, **Figure 3G, H**) were well within the measurable range,  
21 *i.e.*, substantially below the apparent half-life obtained for the quasi-irreversibly, nanobody-  
22 crosslinked control ( $t_{1/2} > 10$  s), which defined the limit of co-tracking fidelity. Together with  
23 the immunoprecipitation experiments (**Figure 1F**) and micropatterning of FHC lacking free  
24 cysteines (**Figure 1E**), these observations clearly establish that the FHC molecules at the

1 plasma membrane are not covalently linked. The short half-life and the non-covalent monomer-  
2 dimer equilibrium observed by size exclusion chromatography at higher micromolar concen-  
3 tration for the isolated  $\alpha_3$  domain (**Figure 4CD**), as well as the mass spectrometry data (**Figure**  
4 **4E-G**), point to a low-affinity interaction with a dimerization  $K_d$  of perhaps 10 to 20  $\mu\text{M}$ . Pre-  
5 vious quantitative studies on affinity-dimerization correlation of heterodimeric cytokine recep-  
6 tors (Wilmes et al., 2015a) would predict efficient FHC dimerization at physiological densities  
7 above 10 molecules/ $\mu\text{m}^2$ , which is in line with the endogenous MHC-I expression level. The  
8 relatively low level of dimerization we observed by SMCT can be rationalized with the high  
9 background of endogenous MHC-I that are unlabeled and invisible to us. In line with this ob-  
10 servation, the decrease of the diffusion coefficient in SMT was much more prominent than the  
11 dimer fraction identified by SMCT. This interpretation is in line with the observation that more  
12 efficient interaction was observed at the highly elevated cell surface expression levels used in  
13 micropatterning experiments.

14 The weak and transient nature of HC/HC dimerization seen by SMT is similar to the nature  
15 of cell surface protein-protein association measured in other systems (Lin et al., 2014). It does  
16 not conflict with the clear and stringent patterning of the GFP fusion in the micropattern/FRAP  
17 experiments. In the latter, the concentration of HA-tagged bait HCs is considerably higher due  
18 to their immobilization by the antibodies, which prevents their endocytosis, and this probably  
19 creates an affinity matrix for the GFP fusions that can retain them for many seconds due to  
20 rebinding events. This also suggests that in endosomes, whose internal volume is very small,  
21 HC/HC interaction might be potentiated due to the increase in the concentration of the mono-  
22 mers compared to the plasma membrane.

23 In line with the observation of non-covalent dimerization in the plasma membrane, we ob-  
24 tained a robust structural model of a self-contained  $K^b$  FHC homodimer. The atomistic model



1 **(Figure 5)** was derived from the experimental findings that dissociation of  $\beta_2m$  is required, that  
2 the  $\alpha_3$  domains are sufficient, and that a direct  $\alpha_3/\alpha_3$  interaction exists **(Figures 1E, 4A-C)**.  
3 We propose that  $\beta_2m$  dissociation exposes a binding site on the FHC for the  $\alpha_3$  domain of  
4 another FHC. However, other arrangements of the two FHCs in a dimer are theoretically pos-  
5 sible, and only experimental data will give a definitive answer.

6 Several findings in the literature are consistent with the formation of complexes of MHC  
7 class I HCs in the absence of  $\beta_2m$  and peptide; this applies both to the 'classical', or class Ia,  
8 proteins HLA-A/B/C (and in mouse: H-2D/K/L) as well as to the 'non-classical', or class Ib,  
9 protein HLA-F (Armony et al., 2021; Bodnar et al., 2003; Chakrabarti et al., 1992; Matko et  
10 al., 1994; Triantafilou et al., 2000). Still, it is important to differentiate these HC/HC dimers  
11 from class I associations described elsewhere (partially reviewed in (Arosa et al., 2007; Camp-  
12 bell et al., 2012)), namely homo- and heterotypic HC/ $\beta_2m$ /peptide trimers that are covalently  
13 dimerized via disulfide bonds in their cytosolic tails (Capps et al., 1993; Makhadiyeva et al.,  
14 2012) and that may play a role in binding the LILRB NK cell receptor (Baia et al., 2016); the  
15 non-covalent nano- and microscale clusters of HC/ $\beta_2m$ /peptide trimers (not detected in our  
16 system) that may stem from the fusion of exocytic vesicles with the plasma membrane and that  
17 may play a role in TCR recognition (Blumenthal et al., 2016; Ferez et al., 2014; Fooksman et  
18 al., 2006; Lu et al., 2012); the macroscopic 'clusters' of class I molecules at the signaling in-  
19 terface between cells (Fassett et al., 2001) and the covalent dimers of the HLA- B\*27:05 heavy  
20 chain that are linked by disulfide bonds through Cys-67 (Chen et al., 2017), though our non-  
21 covalent HC/HC dimers may be a precursor to the formation of the latter.

22 The unexpected discovery that FHCs non-covalently associate into defined dimers allows  
23 exciting hypotheses of their distinct functional properties. FHC dimers might be responsible  
24 for the immunomodulatory functions of cell surface heavy chains, *i.e.*, the stabilization of

1 MHC-I trimers to assist T cell activation (Geng et al., 2018; Schell, 2002) and direct binding  
2 of FHCs to receptors on other cells (for example, FHCs of HLA-F binding to activating recep-  
3 tors on NK cells (Dulberger et al., 2017, 2017; Goodridge et al., 2013)). Furthermore, dimeri-  
4 zation of FHCs might enhance endocytosis in order to remove the non-functional FHCs, which  
5 themselves cannot activate T cells and are known to be short-lived (Mahmutefendic et al.,  
6 2011; S. Montealegre et al., 2015); alternatively or additionally, such associated HCs may bind  
7 to other proteins *in cis* and promote their removal from the plasma membrane. Such endocytic  
8 removal might be achieved by altered endosomal routing, since the local density of membrane  
9 proteins in endosomes is higher than at the plasma membrane, and thus, efficient dimerization  
10 of MHC-I FHCs is expected. In such a scenario, even transient oligomerization in endosomes  
11 might prevent the return of internalized MHC-I FHCs to the cell surface (S. Montealegre et al.,  
12 2015). Taken together, the presence of non-covalent, transient FHC dimers points to exciting  
13 new aspects in the regulation of MHC-I functions with much potential for further investigation.

# 1 Materials and Methods

## 2 Key resources table

| Reagent type (species) or resource                                 | Designation                                                              | Source or reference                                                                | Identifiers         | Additional Information                                                                                                                    |
|--------------------------------------------------------------------|--------------------------------------------------------------------------|------------------------------------------------------------------------------------|---------------------|-------------------------------------------------------------------------------------------------------------------------------------------|
| gene ( <i>Mus (M.) musculus</i> )                                  | H-2K <sup>b</sup>                                                        | NCBI GenBank                                                                       | NM_001001892.2      | Used for plasmid design                                                                                                                   |
| gene ( <i>M. musculus</i> )                                        | H-2D <sup>b</sup>                                                        | NCBI GenBank                                                                       | NM_010380.3         | Used for plasmid design                                                                                                                   |
| gene ( <i>M. musculus</i> )                                        | TAP2                                                                     | NCBI GenBank                                                                       | NM_011530.3         | Used for plasmid design                                                                                                                   |
| strain, strain background ( <i>Escherichia (E.) coli Rosetta</i> ) | BL21(DE3) pLysS                                                          | Novagen                                                                            | Cat. # 70956        | Used for expression of recombinant $\alpha_3$ domain of K <sup>b</sup>                                                                    |
| cell line ( <i>homo sapiens</i> )                                  | STF1                                                                     | PMID:10074495                                                                      | N/A                 | Used for all experiments                                                                                                                  |
| recombinant DNA reagent                                            | pET3a (plasmid)                                                          | Novagen                                                                            | Cat. # 69418-3      | Used for transformation of <i>E. coli</i>                                                                                                 |
| recombinant DNA reagent                                            | puc2CL6IPwo (lentiviral vector)                                          | PMID: 21248040                                                                     | N/A                 | Used for transduction and transfection                                                                                                    |
| recombinant DNA reagent ( <i>M. musculus</i> )                     | puc2CL6IPwo/ E3-HA-K <sup>b</sup>                                        | DOI: <a href="https://doi.org/10.7554/eLife.34150.001">10.7554/eLife.34150.001</a> | N/A                 | For stable transduction of STF1 cells                                                                                                     |
| recombinant DNA reagent ( <i>M. musculus</i> )                     | puc2CL6IPwo/ K <sup>b</sup> -GFP                                         | DOI: <a href="https://doi.org/10.7554/eLife.34150.001">10.7554/eLife.34150.001</a> | N/A                 | For stable co-transduction of HA-K <sup>b</sup> expressing STF1 cells                                                                     |
| recombinant DNA reagent ( <i>M. musculus</i> )                     | puc2CL6IPwo/ D <sup>b</sup> -GFP                                         | DOI: <a href="https://doi.org/10.7554/eLife.34150.001">10.7554/eLife.34150.001</a> | N/A                 |                                                                                                                                           |
| recombinant DNA reagent ( <i>M. musculus</i> )                     | puc2CL6IPwo/ TAP2                                                        | This paper                                                                         | N/A                 |                                                                                                                                           |
| recombinant DNA reagent ( <i>M. musculus</i> )                     | puc2CL6IPwo/K <sup>b</sup> (Y84 C/A139C)-GFP (plasmid)                   | DOI: <a href="https://doi.org/10.1242/jcs.145334">10.1242/jcs.145334</a>           | N/A                 | 10 $\mu$ g for transfection of one 10-cm plate of confluent cells                                                                         |
| recombinant DNA reagent ( <i>M. musculus</i> )                     | puc2CL6IPwo/K <sup>b</sup> (C33 2S)-GFP                                  | This paper                                                                         | N/A                 |                                                                                                                                           |
| recombinant DNA reagent ( <i>M. musculus</i> )                     | puc2CL6IPwo/ $\alpha_3$ domain (of K <sup>b</sup> )-GFP                  | This paper                                                                         | N/A                 |                                                                                                                                           |
| antibody                                                           | 12CA5 (anti-hemagglutinin (HA))                                          | PMID: 6192445. (Niman et al., 1983) <sup>7</sup>                                   | N/A                 | Produced and purified in house from hybridoma cells 0.6 mg/mL for printing; 1:100 dilution of hybridoma supernatant for Western blotting. |
| antibody                                                           | polyclonal rabbit anti-HA                                                | Abcam                                                                              | Cat. # ab9110       | Used as primary antibody in Western blot, according to manufacturer's recommendations                                                     |
| antibody                                                           | alkaline phosphatase-conjugated goat anti-rabbit serum                   | Biorad                                                                             | Cat. #1706518       | Used as primary antibody in Western blot, according to manufacturer's recommendations                                                     |
| peptide, recombinant protein                                       | SIINFEEKL peptide                                                        | GeneCust Ellange, Luxemburg                                                        | N/A                 | 2 mM final concentration                                                                                                                  |
| commercial assay or kit                                            | HiLoad <sup>®</sup> 16/600 Superdex <sup>®</sup> 200 pg (column for SEC) | GE Healthcare                                                                      | Cat. # GE28-9893-35 | Used for purification of recombinant $\alpha_3$ domain of K <sup>b</sup>                                                                  |
| chemical compound, drug                                            | Alexa Fluor 647 NHS ester                                                | Thermo Fisher Scientific                                                           | Cat. # A37566       | Used for labelling anti-HA antibodies for micropattern assay according to the manufacturer's protocol.                                    |
| chemical compound, drug                                            | Brefeldin A Solution (1,000X)                                            | BioLegend                                                                          | Cat. # 420601       | 10 $\mu$ g/ml                                                                                                                             |

| Reagent type (species) or resource | Designation                  | Source or reference           | Identifiers                                                         | Additional Information                                                                          |
|------------------------------------|------------------------------|-------------------------------|---------------------------------------------------------------------|-------------------------------------------------------------------------------------------------|
| software, algorithm                | ImageJ                       | National Institutes of Health | <a href="https://imagej.nih.gov/ij/">https://imagej.nih.gov/ij/</a> | Used for image processing (cropping, rotation and adjustment of brightness and contrast levels) |
| software, algorithm                | GraphPad Prism version 8.4.0 | GraphPad Software             | <a href="https://www.graphpad.com">https://www.graphpad.com</a>     |                                                                                                 |

1

## 2 **Cells and cell lines**

3 TAP-deficient human STF1 fibroblasts (kindly provided by Henri de la Salle, Etablissement  
4 de Transfusion Sanguine de Strasbourg, Strasbourg, France) were cultivated at 37 °C and 5%  
5 CO<sub>2</sub> in Earle's minimum Essential Medium (MEM) with stable glutamine supplemented with  
6 10% fetal bovine serum (FBS), non-essential amino acids and HEPES buffer without addition  
7 of antibiotics.

8

## 9 **Genes, vectors, and gene expression**

10 HA-K<sup>b</sup> and K<sup>b</sup>-GFP constructs were described previously (Dirscherl et al., 2018). HA-K<sup>b</sup>  
11 carries an influenza hemagglutinin (HA) tag at the N terminus of the full-length murine H-2K<sup>b</sup>,  
12 whereas K<sup>b</sup>-GFP carries a GFP domain at the C terminus of H-2K<sup>b</sup>. The D<sup>b</sup>-GFP construct is  
13 analogous to the K<sup>b</sup>-GFP construct. The  $\alpha_3$ -GFP construct consisted of the H-2K<sup>b</sup> signal  
14 sequence and residues 204-369 of H-2K<sup>b</sup>, including transmembrane and cytosolic domains.  
15 The GFP-K<sup>b</sup> construct used in single-molecule imaging consists of a signal sequence and GFP  
16 fused to the N terminus of H-2K<sup>b</sup> itself lacking a signal sequence.

17 Stable cell lines were generated by lentiviral transduction as described (Hein et al., 2014),  
18 and transient transfection was achieved by electroporation (Garstka et al., 2007) or by calcium  
19 phosphate precipitation (Graham and van der Eb, 1973) as described.

20

1       **Micropattern assay**

2        *Photolithography.* Silicon master molds were prepared by semiconductor photolithography  
3 as described previously (Dirscherl et al., 2017).

4        *PDMS stamps and Antibody Patterns.* PDMS stamps were generated from basic elastomer  
5 and curing agent (Sylgard 184 Silicone Elastomer Kit) as described previously (Dirscherl et  
6 al., 2017).

7        *Patterning cell surface proteins.* Coverslips with antibody pattern were placed into sterile  
8 6-well plates. Cells were immediately seeded as indicated at a concentration of ca. 50 000 cells  
9 per well. Usually, cells were incubated for 4-6 hours at 37 °C for adhesion and then shifted to  
10 25 °C to accumulate MHC-I molecules at the cell surface. Samples were then kept at 25 °C to  
11 increase cell surface heterodimer levels or shifted back to 37 °C for 3-4 hours to induce FHCs  
12 by dissociation of  $\beta_2m$ .

13        *Dyes.* Purified antibodies were labeled with Alexa Fluor 647 NHS ester (Thermo Fisher  
14 Scientific, Darmstadt, Germany) according to the manufacturer's protocol.

15        *Peptides.* The K<sup>b</sup>-specific peptide SL8 (SIINFEKL in the single-letter amino acid code) was  
16 synthesized by GeneCust (Ellange, Luxemburg) and emc microcollections (Tübingen, Ger-  
17 many) and purified by HPLC (90% purity.) Peptides were added to the cells at a final concen-  
18 tration of 2  $\mu$ M for 15-30 min at 37 °C to induce peptide binding (Dirscherl et al., 2018).

19        *Washing and fixation.* Cells were washed with phosphate buffered saline (PBS), 10 mM  
20 phosphate pH 7.5, 150 mM NaCl), fixed with 3% paraformaldehyde (PFA), and observed by  
21 confocal laser scanning microscopy (cLSM).

22        *Microscopy.* We used a confocal laser scanning microscope (LSM 510 Meta, Carl Zeiss  
23 Jena GmbH, Germany) equipped with argon and helium-neon lasers at 488, 543, and 633 nm.  
24 Images were recorded with a 63 $\times$  Plan Aplanachromat oil objective (numerical aperture 1.4) at a

1 resolution of  $1596 \times 1596$  pixels. Data acquisition was performed with the LSM 510 META  
2 software, release 3.2 (Carl Zeiss Jena). During image acquisition, patterns and cells were im-  
3 aged in the same focal plane at a pinhole of 1 Airy unit. Image analysis and processing were  
4 performed using ImageJ (National Institutes of Health, Bethesda, USA). Image processing  
5 comprised cropping, rotation and adjustment of brightness and contrast levels. Experiments in  
6 Figure 1 were repeated at least three times each.

7

### 8 **Recombinant $\alpha_3$ domain of H-2K<sup>b</sup>**

9 The  $\alpha_3$  domain of H-2K<sup>b</sup> (residues 205-295) was cloned into pET3a (preceded by the resi-  
10 dues MAIQR and followed by DRDM) and expressed in *E. coli* BL21(DE3) *pLysS*, refolded  
11 *in vitro* as described, and isolated by size exclusion chromatography (SEC) on a Cytiva Hiload  
12 Superdex 200 16/600 column (Anjanappa et al., 2020). Molecular weights of the peaks were  
13 determined by comparison to SEC protein standards (Cytiva), namely bovine thyroglobulin  
14 (670 kDa), bovine gamma globulin (158 kDa), chicken ovalbumin (44 kDa), horse myoglobin  
15 (17 kDa), and vitamin B12 (1.35 kDa). The D5 fraction, corresponding to the elution peak at  
16 approximately 20-30 kDa, was boiled with or without DTT (0.6 M final concentration) in sam-  
17 ple buffer (LSB) (350 mM Tris-Cl pH 6.8, 10.28% sodium dodecyl sulfate (SDS), 36% glyc-  
18 erol 0.012% bromophenol blue). Inclusion body extract boiled without DTT (non-reducing)  
19 served as positive control for the formation of covalent oligomers. Protein quality control after  
20 refolding and SEC was performed by nanoscale differential scanning fluorimetry (nanoDSF)  
21 runs (see **Figure 4S2**) acquired with a Nanotemper Prometheus NT.48 fluorimeter (Nanotem-  
22 per, Munich) controlled by PR.ThermControl (version 2.1.2).

23

## 1        **Precipitation of surface class I**

2        TAP2-deficient STF1 cells expressing either CE3-HA-K<sup>b</sup> or CE3-HA-B\*27:05 were kept  
3        overnight at 25 °C and then pretreated with tris(2-carboxyethyl)phosphine (TCEP; 1 mM,  
4        10 min), labeled with 400 nm of Bio-MPAA-K3 (5 min) at room temperature (RT) (Reinhardt  
5        et al., 2014). Lysis was performed in native lysis buffer (50 mM Tris Cl (pH7.4), 150 mM  
6        NaCl, 5 mM EDTA, and 1% Triton X100) for 1 hour at 4 °C. Biotinylated surface proteins  
7        were then isolated with neutravidin-coated agarose beads (Thermo Fisher Scientific, Darmstadt  
8        Germany). The isolates were boiled at 95 °C for 7 min in the presence (reducing) or absence  
9        (non-reducing) of 10 mM dithiothreitol (DTT) in sample buffer as described above. Samples  
10       were separated by SDS-PAGE and transferred onto polyvinylidene fluoride (PVDF) mem-  
11       branes. MHC molecules were visualized on the membranes with polyclonal rabbit anti-HA  
12       antibody as primary antibody (ab9110, Abcam, Cambridge, United Kingdom) and alkaline  
13       phosphatase-conjugated anti-rabbit serum from goat as secondary antibody (1706518, Biorad,  
14       Munich, Germany). The signals were visualized by treating the blot with BCIP/NBT substrate  
15       (B1911, Sigma Aldrich, St. Louis, Missouri, United States).

16

## 17        **Flow cytometry**

18        For verification of cell surface levels of MHC-I, flow cytometry was performed with anti-  
19        HLA class I antibody W6/32 (Barnstable, 1978) and anti-HA antibody (12CA5, described in  
20        key resources table). Antibody-antigen complexes were labeled with goat secondary antibody  
21        against mouse IgG conjugated with allophycocyanin (APC) (115-135-164, Dianova, Hamburg,  
22        Germany). Fluorescent signal was recorded by a CyFlow1Space flow cytometer (Sysmex- Par-  
23        tec, Norderstedt, Germany) and analyzed by Flowjo, LLC software.

24

## 1      **FRAP**

2      **Microcontact printing and antibody patterning for total internal reflection fluores-**  
3 **cence (TIRF) microscopy** was performed as described previously (Lanzerstorfer et al., 2020).  
4 In short, a field of a large-area PFPE elastomeric stamp (1  $\mu$ M grid size), obtained by the EV-  
5 Group (St. Florian am Inn, Upper Austria, Austria), was cut out, and washed by flushing with  
6 ethanol (100%) and distilled water. After drying with nitrogen, the stamp was incubated in  
7 50 mL bovine serum albumin (BSA) solution (1 mg/mL) for 30 min. This step was followed  
8 by washing the stamp again with PBS and distilled water. After drying with nitrogen, the stamp  
9 was placed with homogeneous pressure onto the clean epoxy-coated glass bottom of a 96-well  
10 plate and incubated overnight at 4 °C. The next day, the stamp was stripped from the glass with  
11 forceps, and the glass bottom was bonded to a 96-well plastic casting with adhesive tape (3M)  
12 and closed with an appropriate lid. For the live cell experiments, a reaction chamber was incu-  
13 bated with 100  $\mu$ L streptavidin solution (50  $\mu$ g/mL) and incubated for 30 min at room temper-  
14 ature. After washing two times with PBS, 100  $\mu$ L biotinylated antibody solution (10  $\mu$ g/mL)  
15 was added for 30 min at room temperature. Finally, the incubation wells were washed twice  
16 with PBS, and cells were seeded at defined cell density for the live cell microscopy analysis.  
17 The cells were allowed to attach to the surface for at least 3-4 h prior to imaging to ensure a  
18 homogeneous cell membrane/substrate interface, which is a prerequisite for quantitative TIRF  
19 microscopy. For negative control to test the adhesion of the antibodies, anti-HA antibody  
20 (Abcam, ab26228) was labeled with a Zenon Alexa Fluor 488 IgG Labeling Kit (Thermofisher,  
21 Z25102), printed, bleached, and fluorescence recovery was quantified as described below (**Fig-**  
22 **ure 2S1**). In a second control experiment, binding and dissociation of a construct with both  
23 tags (HA-K<sup>b</sup>-GFP) from the antibody micropattern was tested, which only accounted for less  
24 than 20% of the mobility of the K<sup>b</sup> fraction (**Figure 2S2**). Thus, in our experiments,  $k_{slow}$  was  
25 determined by the binding events between K<sup>b</sup>-GFP and other K<sup>b</sup> molecules.



1

2       **Live-cell TIRF microscopy.** The detection system was set up on an epi-fluorescence mi-  
3 croscope (Nikon Eclipse Ti2). A multi-laser engine (Toptica Photonics, Munich, Germany)  
4 was used for selective fluorescence excitation of GFP at 488 nm and RFP at 568 nm. The sam-  
5 ples were illuminated in total internal reflection (TIR) configuration (Nikon Ti-LAPP) using a  
6 60x oil immersion objective (NA = 1.49, APON 60XO TIRF). After appropriate filtering with  
7 standard filter sets, the fluorescence was imaged onto a sCMOS camera (Zyla 4.2, Andor,  
8 Northern Ireland). The samples were mounted on an x-y-stage (CMR-STG-MHIX2-motorized  
9 table, Märzhäuser, Germany), and scanning of the larger areas was supported by a laser-guided  
10 automated Perfect Focus System (Nikon PFS).

11       **TIR-FRAP experiments and calculation of diffusion coefficients.** FRAP experiments  
12 were carried out on an epi-fluorescence microscope as described above. Single patterns (or  
13 equivalent ROIs with 1  $\mu$ M in diameter in unpatterned cells) were photobleached (Andor  
14 FRAPPA) with a high-intensity laser pulse (488 nm) applied for 500 ms. Recovery images  
15 were recorded at indicated time intervals. Normalization of data was done by pre-bleach im-  
16 ages, and first data analysis was carried out using NIS Elements software package (Nikon).  
17 Further data processing was done in Graphpad Prism. Resulting FRAP curves were plotted  
18 based on the standard error of the mean and fitted using a bi-exponential equation. Kinetic  
19 FRAP parameters were directly obtained from curve fitting with the following model assump-  
20 tions: Since unhindered MHC-I diffusion (e.g., off pattern and/or after peptide treatment; Fig.  
21 2E) was found to be much faster than the recovery within our pattern elements, we applied a  
22 diffusion-uncoupled recovery scheme (Sprague and McNally, 2005). Here, after the photo-  
23 bleaching step, fluorescent molecules rapidly diffuse throughout the bleached micropattern,

1 and only bound bleached molecules remain inside the spot. The bleached molecules then grad-  
2 ually dissociate from their binding sites. Unbleached molecules can then replace the bleached  
3 molecules at the binding sites as they become vacant. The diffusion-uncoupled FRAP recovery  
4 curve consists of two separable components: the early recovery due to diffusion and the slower  
5 recovery due to exchange at binding sites, and can be fitted using a diffusion-uncoupled two-  
6 component fit:

$$7 \quad Y = Y_{t=0} + A_1(1 - e^{-k_{fast}x}) + A_2(1 - e^{-k_{slow}x}),$$

8 where  $A_1$  is the amplitude of the fast-diffusing population,  $A_2$  the amplitude of the slow  
9 diffusing population (binding reaction), and  $k_{fast}$  and  $k_{slow}$  are the rate constants of  $A_1$  and  $A_2$ ,  
10 respectively.

11 Diffusion coefficients were obtained using the initial image recordings and the simFRAP  
12 plugin for ImageJ (Blumenthal *et al.*, 2015).

13 **Temperature-induced  $K^b$  associations.** Temperature-dependent experiments were carried  
14 out on an epi-fluorescence microscope as described above further equipped with a cage incu-  
15 bator (Okolab, Shanghai, China). Cells were grown at 25 °C overnight on antibody-patterned  
16 surfaces and treated with SIINFEKL peptide as indicated. For induction of  $K^b$  FHC association,  
17 cells were mounted on pre-warmed microscopy stage, and imaging of the GFP signal was  
18 started when the medium reached 37 °C.

19 **Fluorescence contrast quantitation.** Contrast analysis was performed as described previ-  
20 ously (Lanzerstorfer *et al.*, 2014) In short, initial imaging recording was supported by the Nikon  
21 NIS Elements software. Images were exported as TIFF frames and fluorescence contrast anal-  
22 ysis was performed with the Spotty framework (Borgmann *et al.*, 2012). The fluorescence con-  
23 trast  $\langle c \rangle$  was calculated as

1 
$$\langle c \rangle = \frac{(F^+ - F^-)}{(F^+ - F_{bg})}$$

2 , where  $F^+$  is the intensity of the inner pixels of the pattern,  $F^-$  the intensity of the surround-  
3 ing pixels of the micropattern, and  $F_{bg}$  the intensity of the global background.

4

## 5 **Single molecule microscopy**

6 **Imaging.** Cells were transferred 48 h post transfection onto glass coverslips coated with a  
7 poly-L-lysine-graft-(polyethylene glycol) copolymer functionalized with RGD tripeptide to  
8 minimize non-specific binding of fluorescent nanobodies (You et al., 2014). Cells imaged in  
9 presence of SL8 peptide (sequence SIINFEKL) were pre-incubated with 1  $\mu$ M of SL8 peptide  
10 12 h before imaging. Single-molecule imaging experiments were conducted by total internal  
11 reflection fluorescence (TIRF) microscopy with an inverted microscope (Olympus IX83)  
12 equipped with a motorized 4-Line TIR illumination condenser (Olympus) and a back-illumi-  
13 nated electron multiplying (EM) CCD camera (iXon Ultra 897, Andor Technology). A 100 $\times$   
14 magnification objective with a numerical aperture of 1.45 (UPLAPO 100 $\times$  HR, NA 1.5, Olym-  
15 pus) together with a 1.6  $\times$  magnification changer was used for TIR illumination of the sample.  
16 Imaging was conducted with or without 1  $\mu$ M of fresh SL8 peptide. The sample was preincu-  
17 bated with 10  $\mu$ g/ml of Brefeldin A (BFA) for 15 min in order to inhibit protein transport of  
18 GFP-K<sup>b</sup>/ $\beta$ <sub>2m</sub> heterodimers to the plasma membrane. All experiments were carried out at 37  $^{\circ}$ C  
19 in medium without phenol red supplemented with an oxygen scavenger and a redox-active  
20 photoprotectant to minimize photobleaching (Vogelsang et al., 2008) and penicillin and strep-  
21 tomycin (PAA). For cell surface labeling of GFP-K<sup>b</sup>, a 1:1 mixture of anti-GFP nanobodies  
22 (2 nM each) site-specifically conjugated with ATTO 643 and ATTO Rho11 (Wilmes et al.,  
23 2020b), respectively, were added to the medium, thus ensuring >90 % binding given the

1 0.3 nM binding affinity (Kirchhofer et al., 2010). After incubation for at least 5 min, image  
2 acquisition was started with the labeled nanobodies kept in the bulk solution during the whole  
3 experiment in order to ensure high equilibrium binding. Dimerization of the positive control  
4 was induced by applying 0.3 nM of a tandem nanobody crosslinker (LaG16V2) binding to an  
5 orthogonal epitope (Fridy et al., 2014). For single molecule co-localization and co-tracking  
6 experiments, orange (ATTO Rho11) and red (ATTO 643) emitting fluorophores were simulta-  
7 neously excited by illumination with a 561 nm laser (MPB Communications) and a 642 nm  
8 laser (MPB Communications). Fluorescence was detected with a spectral image splitter (Quad-  
9 View QV2, Photometrics) with a dichroic beam splitter (Chroma) combined with the bandpass  
10 filter 600/37 (BrightLine HC) for detection of ATTO Rho11 and 685/40 (Brightline HC) for  
11 detection of ATTO 643 dividing each emission channel into  $256 \times 256$  pixels. Image stacks of  
12 150 frames were recorded for each cell at a time resolution of 32 ms/frame. Diffusion constants  
13 were determined by mean square displacement analysis within a time window of 320 ms (10  
14 frames).

15 **Single molecule analysis.** MHC homodimerization was quantified based on sequential co-  
16 localization and co-tracking analysis using self-written Matlab code “SlimFAST “ as described  
17 in detail previously (Roder et al., 2014; Wilmes et al., 2015b). After aligning ATTO 643 and  
18 ATTO Rho11 channels with sub-pixel precision through spatial transformation based on a cal-  
19 ibration measurement with multicolor fluorescent beads (TetraSpeck microspheres 0.1  $\mu\text{m}$ ,  
20 Invitrogen), individual molecules detected in both spectral channels of the same frame within  
21 a distance threshold of 100 nm were considered to be co-localized. For SMCT analysis, the  
22 multiple-target tracing (MTT) algorithm was applied to this dataset of co-localized molecules  
23 to reconstruct co-locomotion trajectories (co-trajectories) from the identified population of co-  
24 localizations. For the co-tracking analysis, only co-trajectories with a minimum of 10 consec-

1 utive steps (320 ms) were considered. This cut-off was determined based on systematic analy-  
2 sis of a negative control experiment with non-interacting model transmembrane proteins (Wil-  
3 mes et al., 2020b) in order to minimize background from random co-localization. The relative  
4 fraction of co-tracked molecules was determined with respect to the absolute number of trajec-  
5 tories from both channels and corrected for homodimers stochastically double-labeled with the  
6 same fluorophore species as follows:

$$7 \quad AB^* = \frac{AB}{2 \times \left[ \left( \frac{A}{A+B} \right) \times \left( \frac{B}{A+B} \right) \right]}$$

$$8 \quad rel. co - locomotion = \frac{2 \times AB^*}{(A+B)}$$

9 where A, B, AB and AB\* are the numbers of trajectories observed for ATTO Rho11,  
10 ATTO 643, co-trajectories and corrected co-trajectories, respectively.

11 For **Figures 3F and 3G**, the relative fraction of co-localized mobile and immobile molecules  
12 was determined with respect to the absolute number of mobile or immobile molecules from  
13 both channels and corrected for homodimers stochastically double-labeled with the same fluor-  
14 ophore species as follows:

$$15 \quad AB^* = \frac{AB/A + AB/B}{2}$$

$$16 \quad rel. fraction = \frac{AB^*}{2 \times \left[ \left( \frac{A}{A+B} \right) \times \left( \frac{B}{A+B} \right) \right]}$$

17 where A, B, AB and AB\* are the numbers of molecules part of a trajectory observed for  
18 ATTO Rho11, ATTO 643, co-localized molecules and corrected co-localized molecules, re-  
19 spectively.

20 Immobile molecules were classified by their appearance within a radius described by the lo-  
21 calization precision and molecular observation probability.

1

2       **Statistics and statistical analysis.** For **Figure 3D-H**, each data point represents the analysis  
3 from one cell, with  $\geq 14$  cells measured per experiment and many trajectories analyzed per cell  
4 (**3D**, 238-2513; **3E**, 238-2513; **3F**, 314-2732; **3G**, 41-354 tracked immobile particles and 362-  
5 3141 mobile particles; **3H**, 2-301 co-trajectories). Statistical significances were calculated by  
6 two-sample Kolmogorov-Smirnov test, Kruskal-Wallis test with multiple comparisons, un-  
7 paired *t* test and two-way ANOVA with multiple comparisons as indicated in the figure leg-  
8 ends, using version Prism 8.4.0 for MacOS (GraphPad, San Diego, USA). Box plots were used  
9 for visualization and indicate the data distribution of second and third quartile (box), median  
10 (line), mean (square) and data range (whiskers).

11

## 12       **Native mass spectrometry**

13       In advance of native MS measurements, a small amount ( $<1\%$ ) of covalent dimers of the  
14  $\alpha_3$  domain, which had formed as side product during refolding, were removed by size exclusion  
15 chromatography on Superdex 75 10/300 GL (Cytiva). Amicon Ultra 0.5 mL centrifugal filter  
16 units (molecular weight cut-off 3 kDa; Merck Millipore) were used at 14,000 x g and 4 °C to  
17 exchange purified protein samples to 150 mM ammonium acetate (99.99 %; Sigma-Aldrich),  
18 pH 7.2. The final concentration of the  $\alpha_3$  domain monomer was 5  $\mu\text{M}$ , 10  $\mu\text{M}$  or 20  $\mu\text{M}$ . Native  
19 MS analysis was implemented on a Q-ToF II mass spectrometer in positive electrospray ioni-  
20 zation mode. The instrument was modified to enable high mass experiments (Waters and MS  
21 Vision, (van den Heuvel et al., 2006)). Sample ions were introduced into the vacuum using  
22 homemade capillaries via a nano-electrospray ionization source in positive ion mode (source  
23 pressure: 10 mbar). Borosilicate glass tubes (inner diameter: 0.68 mm, outer diameter: 1.2 mm;  
24 World Precision Instruments) were pulled into closed capillaries in a two-step program using

1 a squared box filament (2.5 mm × 2.5 mm) within a micropipette puller (P-1000, Sutter Instru-  
2 ments). The capillaries were then gold-coated using a sputter coater ( $5.0 \times 10^{-2}$  mbar, 30.0 mA,  
3 100 s, 3 runs to vacuum limit  $3.0 \times 10^{-2}$  mbar argon, distance of plate holder: 5 cm; CCU-010,  
4 safematic). Capillaries were opened directly on the sample cone of the mass spectrometer. In  
5 regular MS mode, spectra were recorded at a capillary voltage of 1.45 kV and a cone voltage  
6 of 100 V to 150 V. Protein species with quaternary structure were assigned by MS/MS analy-  
7 sis. These experiments were carried out using argon as collision gas ( $1.2 \times 10^{-2}$  mbar). The  
8 acceleration voltage ranged from 10 V to 100 V. Comparability of results was ensured as MS  
9 quadrupole profiles and pusher settings were kept constant in all measurements. A spectrum of  
10 cesium iodide (25 g/L) was recorded on the same day of the particular measurement to calibrate  
11 the data.

12 All spectra were evaluated regarding experimental mass (MassLynx V4.1, Waters) and area  
13 under the curve (AUC; UniDec (Marty et al., 2015)) of the detected mass species. The values  
14 of the shown averaged masses and AUC of the different species as well as the corresponding  
15 standard deviation result from at least three independent measurements. Exact experimental  
16 masses are presented in **Figure 4S1**.

17

### 18 **Molecular model of the K<sup>b</sup> heavy chain dimer**

19 The crystal structure of K<sup>b</sup> in complex with a chicken ovalbumin epitope (PDB 3p9m)  
20 served as template to generate a model of the heavy chain dimer. Using the Pymol program  
21 (DeLano, 2002), it was possible to superimpose a copy of the 3p9m heavy chain on the  $\beta_2$ m  
22 subunit of a second 3p9m structure (FHC dimer). The superposition involved only the match-  
23 ing of the  $\alpha_3$  domain backbone of the K<sup>b</sup> molecule (residues 181-277) onto the  $\beta_2$ m subunit  
24 resulting in a small root-mean-square deviation (RMSD) of 1.25 Å. Very little steric overlap

1 of the superimposed  $\alpha_3$  domain with the second heavy chain was detected. This minimal over-  
2 lap of the  $\alpha_1/\alpha_2$  domain of the superimposed heavy chain was removed by adjusting backbone  
3 dihedral angles of residues 179-181 in the linker between  $\alpha_1/\alpha_2$  domain and the  $\alpha_3$  domain.  
4 The initial structural model was energy-minimized to remove any residual steric overlap and  
5 was prepared for molecular dynamics (MD) simulations using the Amber18 package (Case et  
6 al., 2018).

7

### 8 **Molecular docking**

9 For comparison of FHC homodimers and K<sup>b</sup> HC/ $\beta_2m$  heterodimers, MD simulations were  
10 performed starting from the coordinates of the K<sup>b</sup> structure in PDB 3p9m. Proteins were solv-  
11 ated in octahedral boxes including explicit sodium and chloride ions (0.15 M) and explicit  
12 TIP3P water molecules keeping a minimum distance of 10 Å between protein atoms and box  
13 boundaries (Jorgensen et al., 1983). The parm14SB force field was used for the proteins and  
14 peptides (Maier et al., 2015). The simulation systems were again energy minimized  
15 (5000 steps) after solvation followed by heating up to 300 K in steps of 100 K with position  
16 restraints on all heavy atoms of the proteins. Subsequently, positional restraints were gradually  
17 removed from an initial  $25 \text{ kcal}\cdot\text{mol}^{-1}\cdot\text{Å}^{-2}$  to  $0.5 \text{ kcal}\cdot\text{mol}^{-1}\cdot\text{Å}^{-2}$  within 0.5 ns followed by a 1 ns  
18 unrestrained equilibration at 300 K. All production simulations were performed at a tempera-  
19 ture of 300 K and a pressure of 1 bar. The hydrogen mass repartition option of Amber was used  
20 to allow a time step of 4 fs (Hopkins et al., 2015). Unrestrained production simulations for up  
21 to 400 ns were performed. The interface packing was analyzed by calculation of the buried  
22 surface area using the Shrake method, (Shrake and Rupley, 1973); analysis of root-mean-  
23 square deviations (RMSD) was performed using the cpptraj module of the Amber18 package.

24



## 1      **Acknowledgements**

2      We thank the donors of reagents as mentioned in the Materials, Venkat Raman Ramnarayan  
3      for comments on the manuscript, Christian P. Richter for support with SMT/SMCT evaluation,  
4      Ankur Saikia and Christian Guenther for performing protein chromatography, the iBiOs staff  
5      for technical support with single molecule microscopy, the SPC facility at EMBL Hamburg for  
6      technical support, and Uschi Wellbrock for excellent technical assistance.

7

## 8      **Funding**

9      Deutsche Forschungsgemeinschaft (DFG SP583/7-2), Bundesministerium für Bildung und  
10     Forschung (BMBF, 031A153A); Tönjes Vagt Foundation (XXXII), iNEXT-Discovery  
11     (11911), Jacobs University (all to SSp); Deutsche Forschungsgemeinschaft (SFB 944, projects  
12     P8 and Z, Facility iBiOs, PI 405/14-1 to JP). PL and JW acknowledge funding from the prov-  
13     ince of Upper Austria as a part of the FH Upper Austria Center of Excellence for Technological  
14     Innovation in Medicine (TIMed Center) and the Christian Doppler Forschungsgesellschaft  
15     (Josef Ressel Center for Phytogetic Drug Research). CU acknowledges funding from the Leib-  
16     niz Association through SAW-2014-HPI-4 grant. The Heinrich-Pette-Institute, Leibniz Insti-  
17     tute for Experimental Virology is supported by the Free and Hanseatic City Hamburg and the  
18     Federal Ministry of Health (Bundesministerium für Gesundheit, BMG).

19

## 20     **Author Contributions**

21     The experimental work was performed as follows: CD, Fig. 1BCDEG; ZH, Fig. 1F; PL,  
22     Fig. 2, 2S1-3, and 4AB; SL, Fig. 3, 3S1-3, movies; ARH, Fig. 4CD; JDK, Fig. 4E-G, 4S1.

1 MGA, CU, JW and JP supervised and interpreted experiments. MZ performed all MD simula-  
2 tions (Fig. 5, 5S1). SSp conceived the work, supervised and coordinated experiments, and  
3 wrote the manuscript in cooperation with JP and PL and assistance by NL with input from all  
4 authors. Funding was acquired by CU, JP, JW, MGA, MZ, PL, and SSp.

5

## 6 **Competing Interests:**

7 The authors declare that no competing interests exist.

8

## 1       **References**

- 2       Allen RL, O’Callaghan CA, McMichael AJ, Bowness P. 1999. Cutting edge: HLA-B27 can  
3       form a novel beta 2-microglobulin-free heavy chain homodimer structure. *J Immunol*  
4       *Baltim Md 1950* **162**:5045–5048.
- 5       Anjanappa R, Garcia-Alai M, Kopicki J-D, Lockhauerbäumer J, Aboelmagd M, Hinrichs J,  
6       Nemtanu IM, Uetrecht C, Zacharias M, Springer S, Meijers R. 2020. Structures of pep-  
7       tide-free and partially loaded MHC class I molecules reveal mechanisms of peptide  
8       selection. *Nat Commun* **11**:1314. doi:10.1038/s41467-020-14862-4
- 9       Antoniou AN, Guiliano DB, Lenart I, Burn G, Powis SJ. 2011. The oxidative folding and mis-  
10       folding of human leukocyte antigen-b27. *Antioxid Redox Signal* **15**:669–684.  
11       doi:10.1089/ars.2010.3692
- 12       Armony G, Heck AJR, Wu W. 2021. Extracellular crosslinking mass spectrometry reveals  
13       HLA class I – HLA class II interactions on the cell surface. *Mol Immunol* **136**:16–25.  
14       doi:10.1016/j.molimm.2021.05.010
- 15       Arosa FA, Santos SG, Powis SJ. 2007. Open conformers: the hidden face of MHC-I molecules.  
16       *Trends Immunol* **28**:115–123. doi:10.1016/j.it.2007.01.002
- 17       Bahadur RP, Zacharias M. 2008. The interface of protein-protein complexes: Analysis of con-  
18       tacts and prediction of interactions. *Cell Mol Life Sci* **65**:1059–1072.  
19       doi:10.1007/s00018-007-7451-x
- 20       Baia D, Pou J, Jones D, Mandelboim O, Trowsdale J, Muntasell A, Lopez-Botet M. 2016.  
21       Interaction of the LILRB1 inhibitory receptor with HLA class Ia dimers. *Eur J Immunol*  
22       **46**:1681–90. doi:10.1002/eji.201546149
- 23       Baía D, Pou J, Jones D, Mandelboim O, Trowsdale J, Muntasell A, López-Botet M. 2016.  
24       Interaction of the LILRB1 inhibitory receptor with HLA class Ia dimers. *Eur J Immunol*  
25       **46**:1681–1690. doi:10.1002/eji.201546149
- 26       Barnstable C. 1978. Production of monoclonal antibodies to group A erythrocytes, HLA and  
27       other human cell surface antigens-new tools for genetic analysis. *Cell* **14**:9–20.  
28       doi:10.1016/0092-8674(78)90296-9
- 29       Blumenthal D, Edidin M, Gheber LA. 2016. Trafficking of MHC molecules to the cell surface  
30       creates dynamic protein patches. *J Cell Sci* **129**:3342–3350. doi:10.1242/jcs.187112
- 31       Bodnar A, Bacso Z, Jenei A, Jovin TM, Edidin M, Damjanovich S, Matko J. 2003. Class I  
32       HLA oligomerization at the surface of B cells is controlled by exogenous beta(2)-mi-  
33       croglobulin: implications in activation of cytotoxic T lymphocytes. *Int Immunol*  
34       **15**:331–9.
- 35       Bondar A, Jang W, Sviridova E, Lambert NA. 2020. Components of the Gs signaling cascade  
36       exhibit distinct changes in mobility and membrane domain localization upon  $\beta 2$  -ad-  
37       renergic receptor activation. *Traffic Cph Den* **21**:324–332. doi:10.1111/tra.12724
- 38       Borgmann DM, Weghuber J, Schaller S, Jacak J, Winkler SM. 2012. Identification of patterns  
39       in microscopy images of biological samples using evolution strategies.
- 40       Campbell EC, Antoniou AN, Powis SJ. 2012. The multi-faceted nature of HLA class I dimer  
41       molecules. *Immunology* **136**:380–384. doi:10.1111/j.1365-2567.2012.03593.x
- 42       Capps GG, Robinson BE, Lewis KD, Zúñiga MC. 1993. In vivo dimeric association of class I  
43       MHC heavy chains. Possible relationship to class I MHC heavy chain-beta 2-micro-  
44       globulin dissociation. *J Immunol* **151**:159–169.

- 1 Case DA, Ben-Shalom IY, Brozell SR, Cerutti DS, Cheatham TE III, Cruzeiro VWD, Darde  
2 TA, Duke RE, Ghoreishi D, Gilson MK, Gohlke H, Goetz AW, Greene D, Harris R,  
3 Homeyer N, Izadi S, Kovalenko A, Kurtzman T, Lee TS, LeGrand S, Li P, Lin C, Liu  
4 J, Luchko T, Luo R, Mermelstein DJ, Merz KM, Miao Y, Monard G, Nguyen C, Ngu-  
5 yen H, Omelyan I, Onufriev A, Pan F, Qi R, Roe DR, Roitberg A, Sagui C, Schott-  
6 Verdugo S, Shen J, Simmerling CL, Smith J, Salomon-Ferrer R, Swails J, Walker RC,  
7 Wang J, Wei H, Wolf RM, Wu X, Xiao L, York DM, Kollman PA. 2018. Amber18.  
8 San Francisco: University of California.
- 9 Chakrabarti A, Matko J, Rahman NA, Barisas BG, Edidin M. 1992. Self-association of class I  
10 major histocompatibility complex molecules in liposome and cell surface membranes.  
11 *Biochemistry* **31**:7182–9.
- 12 Chen B, Li J, He C, Li D, Tong W, Zou Y, Xu W. 2017. Role of HLA-B27 in the pathogenesis  
13 of ankylosing spondylitis. *Mol Med Rep* **15**:1943–1951. doi:10.3892/mmr.2017.6248
- 14 Comber JD, Philip R. 2014. MHC class I antigen presentation and implications for developing  
15 a new generation of therapeutic vaccines. *Ther Adv Vaccines* **2**:77–89.  
16 doi:10.1177/2051013614525375
- 17 Dangoria NS, DeLay ML, Kingsbury DJ, Mear JP, Uchanska-Ziegler B, Ziegler A, Colbert  
18 RA. 2002. HLA-B27 Misfolding Is Associated with Aberrant Intermolecular Disulfide  
19 Bond Formation (Dimerization) in the Endoplasmic Reticulum. *J Biol Chem*  
20 **277**:23459–23468. doi:10.1074/jbc.M110336200
- 21 Day PM, Esquivel F, Lukszo J, Bennink JR, Yewdell JW. 1995. Effect of TAP on the genera-  
22 tion and intracellular trafficking of peptide-receptive major histocompatibility complex  
23 class I molecules. *Immunity* **2**:137–147. doi:10.1016/S1074-7613(95)80014-X
- 24 DeLano WL. 2002. Pymol: An open-source molecular graphics tool. *CCP4 Newsl Protein*  
25 *Crystallogr* **82**–92.
- 26 Dirscherl C, Hein Z, Ramnarayan VR, Jacob-Dolan C, Springer S. 2018. A two-hybrid anti-  
27 body micropattern assay reveals specific in cis interactions of MHC I heavy chains at  
28 the cell surface. *eLife* **7**:e34150. doi:10.7554/eLife.34150
- 29 Dirscherl C, Palankar R, Delcea M, Kolesnikova TA, Springer S. 2017. Specific Capture of  
30 Peptide-Receptive Major Histocompatibility Complex Class I Molecules by Antibody  
31 Micropatterns Allows for a Novel Peptide-Binding Assay in Live Cells. *Small*  
32 **13**:1602974. doi:10.1002/smll.201602974
- 33 Dulberger CL, McMurtrey CP, Hölzemer A, Neu KE, Liu V, Steinbach AM, Garcia-Beltran  
34 WF, Sulak M, Jabri B, Lynch VJ, Altfeld M, Hildebrand WH, Adams EJ. 2017. Human  
35 Leukocyte Antigen F Presents Peptides and Regulates Immunity through Interactions  
36 with NK Cell Receptors. *Immunity* **46**:1018-1029.e7. doi:10.1016/j.im-  
37 muni.2017.06.002
- 38 Edidin M, Achilles S, Zeff R, Wei T. 1997. Probing the stability of class I major histocompat-  
39 ibility complex (MHC) molecules on the surface of human cells. *Immunogenetics*  
40 **46**:41–45. doi:10.1007/s002510050240
- 41 Elliott T, Cerundolo V, Elvin J, Townsend A. 1991. Peptide-induced conformational change  
42 of the class I heavy chain. *Nature* **351**:402–406. doi:10.1038/351402a0
- 43 Fassett MS, Davis DM, Valter MM, Cohen GB, Strominger JL. 2001. Signaling at the inhibi-  
44 tory natural killer cell immune synapse regulates lipid raft polarization but not class I  
45 MHC clustering. *Proc Natl Acad Sci U S A* **98**:14547–14552.  
46 doi:10.1073/pnas.211563598

- 1 Ferez M, Castro M, Alarcon B, van Santen HM. 2014. Cognate peptide-MHC complexes are  
2 expressed as tightly apposed nanoclusters in virus-infected cells to allow TCR cross-  
3 linking. *J Immunol* **192**:52–8. doi:10.4049/jimmunol.1301224
- 4 Fooksman DR, Grönvall GK, Tang Q, Edidin M. 2006. Clustering Class I MHC Modulates  
5 Sensitivity of T Cell Recognition. *J Immunol* **176**:6673–6680. doi:10.4049/jim-  
6 munol.176.11.6673
- 7 Fridy PC, Li Y, Keegan S, Thompson MK, Nudelman I, Scheid JF, Oeffinger M, Nussenzweig  
8 MC, Fenyö D, Chait BT, Rout MP. 2014. A robust pipeline for rapid production of  
9 versatile nanobody repertoires. *Nat Methods* **11**:1253–1260. doi:10.1038/nmeth.3170
- 10 Gakamsky DM, Bjorkman PJ, Pecht I. 1996. Peptide Interaction with a Class I Major Histo-  
11 compatibility Complex-Encoded Molecule: Allosteric Control of the Ternary Complex  
12 Stability †. *Biochemistry* **35**:14841–14848. doi:10.1021/bi961707u
- 13 Gambin Y, Lopez-Esparza R, Reffay M, Sierecki E, Gov NS, Genest M, Hodges RS, Urbach  
14 W. 2006. Lateral mobility of proteins in liquid membranes revisited. *Proc Natl Acad*  
15 *Sci U S A* **103**:2098–2102. doi:10.1073/pnas.0511026103
- 16 Garstka M, Borchert B, Al-Balushi M, Praveen P, Kühl N, Majoul I, Duden R, Springer S.  
17 2007. Peptide-receptive Major Histocompatibility Complex Class I Molecules Cycle  
18 between Endoplasmic Reticulum and *cis* -Golgi in Wild-type Lymphocytes. *J Biol*  
19 *Chem* **282**:30680–30690. doi:10.1074/jbc.M701721200
- 20 Geng J, Altman JD, Krishnakumar S, Raghavan M. 2018. Empty conformers of HLA-B pref-  
21 erentially bind CD8 and regulate CD8+ T cell function. *eLife* **7**:e36341.  
22 doi:10.7554/eLife.36341
- 23 Goodridge JP, Lee N, Burian A, Pyo C-W, Tykodi SS, Warren EH, Yee C, Riddell SR,  
24 Geraghty DE. 2013. HLA-F and MHC-I Open Conformers Cooperate in a MHC-I An-  
25 tigen Cross-Presentation Pathway. *J Immunol* **191**:1567–1577. doi:10.4049/jim-  
26 munol.1300080
- 27 Graham FL, van der Eb AJ. 1973. A new technique for the assay of infectivity of human ade-  
28 novirus 5 DNA. *Virology* **52**:456–467. doi:10.1016/0042-6822(73)90341-3
- 29 Hein Z, Uchtenhagen H, Abualrous ET, Saini SK, Janssen L, Van Hateren A, Wiek C, Hanen-  
30 berg H, Momburg F, Achour A, Elliott T, Springer S, Boulanger D. 2014. Peptide-  
31 independent stabilization of MHC class I molecules breaches cellular quality control. *J*  
32 *Cell Sci* **127**:2885–2897. doi:10.1242/jcs.145334
- 33 Ho CCM, Chhabra A, Starkl P, Schnorr P-J, Wilmes S, Moraga I, Kwon H-S, Gaudenzio N,  
34 Sibilano R, Wehrman TS, Gakovic M, Sockolosky JT, Tiffany MR, Ring AM, Piehler  
35 J, Weissman IL, Galli SJ, Shizuru JA, Garcia KC. 2017. Decoupling the Functional  
36 Pleiotropy of Stem Cell Factor by Tuning c-Kit Signaling. *Cell* **168**:1041-1052.e18.  
37 doi:10.1016/j.cell.2017.02.011
- 38 Hopkins CW, Le Grand S, Walker RC, Roitberg AE. 2015. Long-Time-Step Molecular Dy-  
39 namics through Hydrogen Mass Repartitioning. *J Chem Theory Comput* **11**:1864–1874.  
40 doi:10.1021/ct5010406
- 41 Ibach J, Radon Y, Gelléri M, Sonntag MH, Brunsveld L, Bastiaens PIH, Verveer PJ. 2015.  
42 Single Particle Tracking Reveals that EGFR Signaling Activity Is Amplified in Clath-  
43 rin-Coated Pits. *PLoS One* **10**:e0143162. doi:10.1371/journal.pone.0143162
- 44 Jorgensen WL, Chandrasekhar J, Madura JD, Impey RW, Klein ML. 1983. Comparison of  
45 simple potential functions for simulating liquid water. *J Chem Phys* **79**:926–935.  
46 doi:10.1063/1.445869

- 1 Kaufman J. 2018. Generalists and Specialists: A New View of How MHC Class I Molecules  
2 Fight Infectious Pathogens. *Trends Immunol* **39**:367–379. doi:10.1016/j.it.2018.01.001
- 3 Kirchhofer A, Helma J, Schmidhals K, Frauer C, Cui S, Karcher A, Pellis M, Muyldermans  
4 S, Casas-Delucchi CS, Cardoso MC, Leonhardt H, Hopfner K-P, Rothbauer U. 2010.  
5 Modulation of protein properties in living cells using nanobodies. *Nat Struct Mol Biol*  
6 **17**:133–138. doi:10.1038/nsmb.1727
- 7 Lanzerstorfer P, Borgmann D, Schütz G, Winkler SM, Höglinger O, Weghuber J. 2014. Quan-  
8 tification and kinetic analysis of Grb2-EGFR interaction on micro-patterned surfaces  
9 for the characterization of EGFR-modulating substances. *PLoS One* **9**:e92151.  
10 doi:10.1371/journal.pone.0092151
- 11 Lanzerstorfer P, Müller U, Gordiyenko K, Weghuber J, Niemeyer CM. 2020. Highly Modular  
12 Protein Micropatterning Sheds Light on the Role of Clathrin-Mediated Endocytosis for  
13 the Quantitative Analysis of Protein-Protein Interactions in Live Cells. *Biomolecules*  
14 **10**:540. doi:10.3390/biom10040540
- 15 Lin W-C, Iversen L, Tu H-L, Rhodes C, Christensen SM, Iwig JS, Hansen SD, Huang WYC,  
16 Groves JT. 2014. H-Ras forms dimers on membrane surfaces via a protein-protein in-  
17 terface. *Proc Natl Acad Sci U S A* **111**:2996–3001. doi:10.1073/pnas.1321155111
- 18 Ljunggren H-G, Stam NJ, Öhlén C, Neeffjes JJ, Höglund P, Heemels M-T, Bastin J, Schu-  
19 macher TNM, Townsend A, Kärre K, Ploegh HL. 1990. Empty MHC class I molecules  
20 come out in the cold. *Nature* **346**:476–480. doi:10.1038/346476a0
- 21 Low-Nam ST, Lidke KA, Cutler PJ, Roovers RC, van Bergen en Henegouwen PMP, Wilson  
22 BS, Lidke DS. 2011. ErbB1 dimerization is promoted by domain co-confinement and  
23 stabilized by ligand binding. *Nat Struct Mol Biol* **18**:1244–1249.  
24 doi:10.1038/nsmb.2135
- 25 Lu X, Gibbs JS, Hickman HD, David A, Dolan BP, Jin Y, Kranz DM, Bennink JR, Yewdell  
26 JW, Varma R. 2012. Endogenous viral antigen processing generates peptide-specific  
27 MHC class I cell-surface clusters. *Proc Natl Acad Sci U S A* **109**:15407–15412.  
28 doi:10.1073/pnas.1208696109
- 29 Mahmutefendic H, Blagojevic G, Tomas MI, Kucic N, Lucin P. 2011. Segregation of open  
30 Major Histocompatibility Class I conformers at the plasma membrane and during en-  
31 dosomal trafficking reveals conformation-based sorting in the endosomal system. *Int J*  
32 *Biochem Cell Biol* **43**:504–15. doi:10.1016/j.biocel.2010.12.002
- 33 Maier JA, Martinez C, Kasavajhala K, Wickstrom L, Hauser KE, Simmerling C. 2015. ff14SB:  
34 Improving the Accuracy of Protein Side Chain and Backbone Parameters from ff99SB.  
35 *J Chem Theory Comput* **11**:3696–3713. doi:10.1021/acs.jctc.5b00255
- 36 Makhadiyeva D, Lam L, Moatari M, Vallance J, Zheng Y, Campbell EC, Powis SJ. 2012.  
37 MHC class I dimer formation by alteration of the cellular redox environment and in-  
38 duction of apoptosis: Redox control of MHC class I dimer formation. *Immunology*  
39 **135**:133–139. doi:10.1111/j.1365-2567.2011.03518.x
- 40 Marty MT, Baldwin AJ, Marklund EG, Hochberg GKA, Benesch JLP, Robinson CV. 2015.  
41 Bayesian Deconvolution of Mass and Ion Mobility Spectra: From Binary Interactions  
42 to Polydisperse Ensembles. *Anal Chem* **87**:4370–4376. doi:10.1021/acs.anal-  
43 chem.5b00140
- 44 Matko J, Bushkin Y, Wei T, Edidin M. 1994. Clustering of class I HLA molecules on the  
45 surfaces of activated and transformed human cells. *J Immunol* **152**:3353–60.



- 1 Montealegre Sebastián, Venugopalan V, Fritzsche S, Kulicke C, Hein Z, Springer S. 2015.  
2 Dissociation of  $\beta_2$ -microglobulin determines the surface quality control of major his-  
3 tocompatibility complex class I molecules. *FASEB J* **29**:2780–2788. doi:10.1096/fj.14-  
4 268094
- 5 Montealegre S., Venugopalan V, Fritzsche S, Kulicke C, Hein Z, Springer S. 2015. Dissocia-  
6 tion of beta2-microglobulin determines the surface quality control of major histocom-  
7 patibility complex class I molecules. *Faseb J* **29**:2780–8. doi:10.1096/fj.14-268094
- 8 Moraga I, Wernig G, Wilmes S, Gryshkova V, Richter CP, Hong W-J, Sinha R, Guo F, Fabi-  
9 onar H, Wehrman TS, Krutzik P, Demharther S, Plo I, Weissman IL, Minary P, Majeti  
10 R, Constantinescu SN, Piehler J, Garcia KC. 2015. Tuning cytokine receptor signaling  
11 by re-orienting dimer geometry with surrogate ligands. *Cell* **160**:1196–1208.  
12 doi:10.1016/j.cell.2015.02.011
- 13 Mylvaganam SM, Grinstein S, Freeman SA. 2018. Picket-fences in the plasma membrane:  
14 functions in immune cells and phagocytosis. *Semin Immunopathol* **40**:605–615.  
15 doi:10.1007/s00281-018-0705-x
- 16 Niman HL, Houghten RA, Walker LE, Reisfeld RA, Wilson IA, Hogle JM, Lerner RA. 1983.  
17 Generation of protein-reactive antibodies by short peptides is an event of high fre-  
18 quency: implications for the structural basis of immune recognition. *Proc Natl Acad*  
19 *Sci* **80**:4949–4953. doi:10.1073/pnas.80.16.4949
- 20 Ortiz-Navarrete V, Hammerling GJ. 1991. Surface appearance and instability of empty H-2  
21 class I molecules under physiological conditions. *Proc Natl Acad Sci* **88**:3594–3597.  
22 doi:10.1073/pnas.88.9.3594
- 23 Reinhardt U, Lotze J, Zernia S, Mörl K, Beck-Sickinger AG, Seitz O. 2014. Peptide-Templated  
24 Acyl Transfer: A Chemical Method for the Labeling of Membrane Proteins on Live  
25 Cells. *Angew Chem Int Ed* **53**:10237–10241. doi:10.1002/anie.201403214
- 26 Richter D, Moraga I, Winkelmann H, Birkholz O, Wilmes S, Schulte M, Kraich M, Kenneweg  
27 H, Beutel O, Selenschik P, Paterok D, Gavutis M, Schmidt T, Garcia KC, Müller TD,  
28 Piehler J. 2017. Ligand-induced type II interleukin-4 receptor dimers are sustained by  
29 rapid re-association within plasma membrane microcompartments. *Nat Commun*  
30 **8**:15976. doi:10.1038/ncomms15976
- 31 Roder F, Wilmes S, Richter CP, Piehler J. 2014. Rapid Transfer of Transmembrane Proteins  
32 for Single Molecule Dimerization Assays in Polymer-Supported Membranes. *ACS*  
33 *Chem Biol* **9**:2479–2484. doi:10.1021/cb5005806
- 34 Schell TD. 2002. The assembly of functional beta2-microglobulin-free MHC class I molecules  
35 that interact with peptides and CD8+ T lymphocytes. *Int Immunol* **14**:775–782.  
36 doi:10.1093/intimm/14.5.775
- 37 Schwarzenbacher M, Kaltenbrunner M, Brameshuber M, Hesch C, Paster W, Weghuber J,  
38 Heise B, Sonnleitner A, Stockinger H, Schutz GJ. 2008. Micropatterning for quantita-  
39 tive analysis of protein-protein interactions in living cells. *Nat Methods* **5**:1053–60.  
40 doi:10.1038/nmeth.1268
- 41 Sevcsik E, Brameshuber M, Folser M, Weghuber J, Honigmann A, Schutz GJ. 2015. GPI-  
42 anchored proteins do not reside in ordered domains in the live cell plasma membrane.  
43 *Nat Commun* **6**:6969. doi:10.1038/ncomms7969
- 44 Shrake A, Rupley JA. 1973. Environment and exposure to solvent of protein atoms. Lysozyme  
45 and insulin. *J Mol Biol* **79**:351–371. doi:10.1016/0022-2836(73)90011-9

- 1 Spack E, Edidin M. 1986. The class I MHC antigens of erythrocytes: a serologic and biochem-  
2 ical study. *J Immunol Baltim Md 1950* **136**:2943–2952.
- 3 Sprague B, McNally J. 2005. FRAP analysis of binding: proper and fitting. *Trends Cell Biol*  
4 **15**:84–91. doi:10.1016/j.tcb.2004.12.001
- 5 Townsend A, Bodmer H. 1989. Antigen recognition by class I -restricted cytotoxic T lympho-  
6 cytes. *Annu Rev Immunol* 601–24.
- 7 Townsend A, Elliott T, Cerundolo V, Foster L, Barber B, Tse A. 1990. Assembly of MHC  
8 class I molecules analyzed in vitro. *Cell* **62**:285–295. doi:10.1016/0092-  
9 8674(90)90366-M
- 10 Townsend A, Öhlén C, Bastin J, Ljunggren H-G, Foster L, Kärre K. 1989. Association of class  
11 I major histocompatibility heavy and light chains induced by viral peptides. *Nature*  
12 **340**:443–448. doi:10.1038/340443a0
- 13 Triantafilou K, Triantafilou M, Wilson KM, Fernandez N. 2000. Human major histocompati-  
14 bility molecules have the intrinsic ability to form homotypic associations. *Hum Immu-  
15 nol* **61**:585–598. doi:10.1016/S0198-8859(00)00112-9
- 16 Vámosi G, Friedländer-Brock E, Ibrahim SM, Brock R, Szöllösi J, Vereb G. 2019. EGF Re-  
17 ceptor Stalls upon Activation as Evidenced by Complementary Fluorescence Correla-  
18 tion Spectroscopy and Fluorescence Recovery after Photobleaching Measurements. *Int  
19 J Mol Sci* **20**:E3370. doi:10.3390/ijms20133370
- 20 van den Heuvel RHH, van Duijn E, Mazon H, Synowsky SA, Lorenzen K, Versluis C, Brouns  
21 SJJ, Langridge D, van der Oost J, Hoyes J, Heck AJR. 2006. Improving the Perform-  
22 ance of a Quadrupole Time-of-Flight Instrument for Macromolecular Mass Spec-  
23 trometry. *Anal Chem* **78**:7473–7483. doi:10.1021/ac061039a
- 24 Váradi T, Schneider M, Sevcsik E, Kiesenhofer D, Baumgart F, Batta G, Kovács T, Platzer R,  
25 Huppa JB, Szöllösi J, Schütz GJ, Brameshuber M, Nagy P. 2019. Homo- and Heteroas-  
26 sociations Drive Activation of ErbB3. *Biophys J* **117**:1935–1947.  
27 doi:10.1016/j.bpj.2019.10.001
- 28 Vogelsang J, Kasper R, Steinhauer C, Person B, Heilemann M, Sauer M, Tinnefeld P. 2008. A  
29 Reducing and Oxidizing System Minimizes Photobleaching and Blinking of Fluores-  
30 cent Dyes. *Angew Chem Int Ed* **47**:5465–5469. doi:10.1002/anie.200801518
- 31 Wilmes S, Beutel O, Li Z, Francois-Newton V, Richter CP, Janning D, Kroll C, Hanhart P,  
32 Hötte K, You C, Uzé G, Pellegrini S, Piehler J. 2015a. Receptor dimerization dynamics  
33 as a regulatory valve for plasticity of type I interferon signaling. *J Cell Biol* **209**:579–  
34 593. doi:10.1083/jcb.201412049
- 35 Wilmes S, Beutel O, Li Z, Francois-Newton V, Richter CP, Janning D, Kroll C, Hanhart P,  
36 Hötte K, You C, Uzé G, Pellegrini S, Piehler J. 2015b. Receptor dimerization dynamics  
37 as a regulatory valve for plasticity of type I interferon signaling. *J Cell Biol* **209**:579–  
38 593. doi:10.1083/jcb.201412049
- 39 Wilmes S, Hafer M, Vuorio J, Tucker JA, Winkelmann H, Löchte S, Stanly TA, Pulgar Prieto  
40 KD, Poojari C, Sharma V, Richter CP, Kurre R, Hubbard SR, Garcia KC, Moraga I,  
41 Vattulainen I, Hitchcock IS, Piehler J. 2020a. Mechanism of homodimeric cytokine  
42 receptor activation and dysregulation by oncogenic mutations. *Science* **367**:643–652.  
43 doi:10.1126/science.aaw3242
- 44 Wilmes S, Hafer M, Vuorio J, Tucker JA, Winkelmann H, Löchte S, Stanly TA, Pulgar Prieto  
45 KD, Poojari C, Sharma V, Richter CP, Kurre R, Hubbard SR, Garcia KC, Moraga I,  
46 Vattulainen I, Hitchcock IS, Piehler J. 2020b. Mechanism of homodimeric cytokine



1 receptor activation and dysregulation by oncogenic mutations. *Science* **367**:643–652.  
2 doi:10.1126/science.aaw3242

3 You C, Richter CP, Löchte S, Wilmes S, Piehler J. 2014. Dynamic Submicroscopic Signaling  
4 Zones Revealed by Pair Correlation Tracking and Localization Microscopy. *Anal Chem*  
5 **86**:8593–8602. doi:10.1021/ac501127r

6

7

8

9

- 1 **Figure legends**
- 2 With the figures.
- 3
- 4

1 **Tables**

2

3 **Table 1:** Comparison of diffusion coefficients (mean  $\pm$  SD in  $\mu\text{m}^2/\text{s}$ ). NA, not applicable.

|                                                                                               | <b>FRAP</b>     | <b>SMT</b>      |
|-----------------------------------------------------------------------------------------------|-----------------|-----------------|
| <b>HC/<math>\beta_2\text{m}</math>/peptide trimers (+peptide)</b>                             | 0.35 $\pm$ 0.12 | 0.35 $\pm$ 0.06 |
| <b>FHCs (-peptide)</b>                                                                        | 0.19 $\pm$ 0.05 | 0.25 $\pm$ 0.04 |
| <b>FHCs (-peptide)<sup>a</sup></b>                                                            | 0.19 $\pm$ 0.05 | 0.18 $\pm$ 0.10 |
| <b>Dimerized HC/<math>\beta_2\text{m}</math>/peptide trimers (+peptide, + CL)</b>             | NA              | 0.20 $\pm$ 0.05 |
| <b>Dimerized HC/<math>\beta_2\text{m}</math>/peptide trimers (+peptide, + CL)<sup>a</sup></b> | NA              | 0.15 $\pm$ 0.04 |

4 <sup>a</sup>only dimers identified by SMCT

5

- 1 **Supplement figure legends**
- 2 With the supplement figures.
- 3

1        **Supplement Movie legends**

2

3        **Movie S1: Dual-color SMCT identifies FHC association in live cell plasma membranes.**

4        GFP-K<sup>b</sup> dimer formation was probed by co-locomotion analysis. Individual GFP-K<sup>b</sup> mole-  
5        cules labeled with Rho11 (magenta) and Dy647 (green) in STF1 cells were imaged by TIRF  
6        microscopy (scale bar, 2.5  $\mu$ m; frame rate, 10 Hz; playback speed, 1/3 real time). Movies were  
7        acquired in the absence of peptide (FHCs, left), in the presence of peptide (HC/ $\beta$ <sub>2</sub>m/peptide  
8        complexes; center) and in the presence of peptide and a crosslinker consisting of a dimeric anti-  
9        GFP nanobody (right). Localized molecules in each channel are encircled, co-locomoting mol-  
10        ecules are highlighted by white diamonds.

11

12        **Movies S2A-D: SMCT demonstrates transient association of FHCs.**

13        Individual GFP-K<sup>b</sup> molecules labeled with Rho11 (magenta) and Dy647 (green) imaged by  
14        TIRF microscopy (scale bar, 450 nm; frame rate, 10 Hz; playback, 1/3 real time). Selected  
15        image section showing SMCT of an individual FHC complex (*i.e.*, in the absence of peptide).  
16        Localized molecules in each channel are encircled, co-locomoting molecules are highlighted  
17        by white diamonds, with the dissociation occurring between 4.03 s and 4.06 s.

18

19        **Movies S3A-B: Molecular dynamics simulations.**

20        **A**, 400 ns MD simulation of an FHC dimer as in **Figure 5**. The extracellular domains of the  
21        FHCs are shown. The  $\alpha$ <sub>3</sub> domain of one K<sup>b</sup> molecule is depicted in yellow, the  $\alpha$ <sub>3</sub> domain of  
22        the other K<sup>b</sup> molecule is depicted in red. The  $\alpha$ <sub>1</sub>/ $\alpha$ <sub>2</sub> superdomains are shown in yellow and  
23        purple for both FHCs.

- 1 **B**, 400 ns MD simulation of the K<sup>b</sup> FHC/ $\beta_2m$  heterodimer. The extracellular domains of the
- 2 FHCs are shown. The light chain  $\beta_2m$  (red) and the  $\alpha_1/\alpha_2$  superdomain (yellow and purple)
- 3 show a favorable interface.

Dirscherl et al., Figure 1

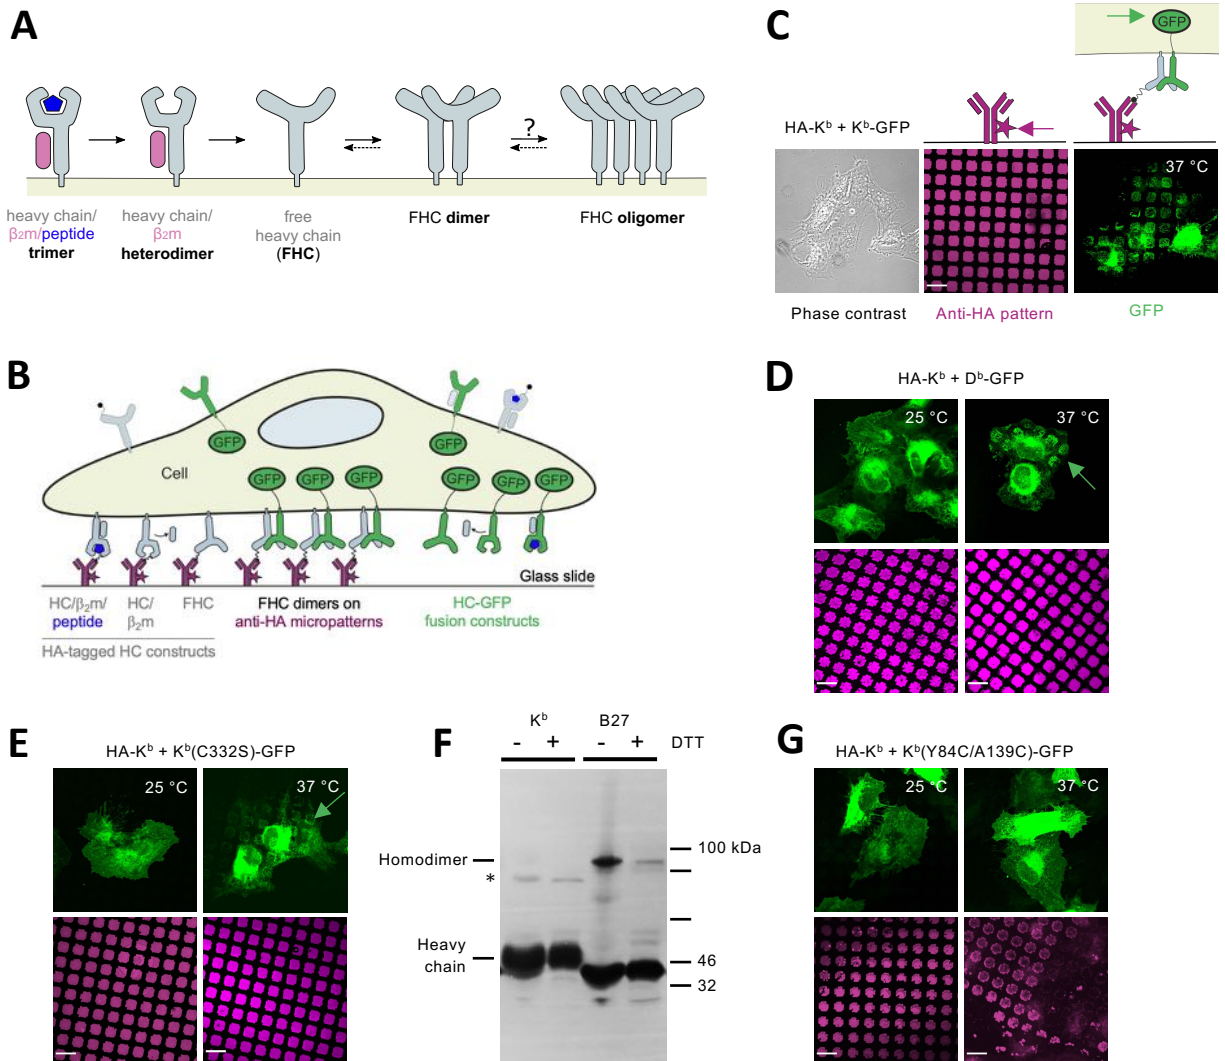

**Figure 1: MHC I HC/HC association requires dissociation of  $\beta_2m$  but no disulfide bonds.**

**A**, Schematic of MHC class I states at the plasma membrane. Dissociation of peptide from the HC/ $\beta_2m$ /peptide trimer results in an 'empty' HC/ $\beta_2m$  heterodimer. Dissociation of  $\beta_2m$  then produces free HCs (FHCs), which can form FHC associations (HC/HC dimer and oligomer shown). Other forms such as disulfide-linked dimers are known depending on the allotype (see the text).

**B**, Schematic representation of the two-hybrid antibody micropattern assay. Cells expressing a class I GFP fusion (green) and an N-terminally HA-tagged class I (gray) are seeded onto glass slides that are printed with micrometer-sized patterns of fluorescently labelled anti-HA antibodies. Dissociation of  $\beta_2m$  generates FHCs of both constructs, which diffuse freely in the plasma membrane and eventually associate with each other to form HC/HC dimers (center) or oligomers (not shown). The HC/HC associations, which contain both HA-tagged and GFP-fused FHCs, localize in the pattern elements and are visible as pattern-shaped GFP fluorescence on the plasma membrane.

**C**, Representative fluorescence micrograph showing one single STF1 cell expressing both HA-tagged and GFP-fused H-2 $K^b$  in phase contrast (left), the purple anti-HA antibody pattern on the glass slide (middle), and green  $K^b$ -GFP colocalizing with the antibody pattern (right). The arrows point to the fluorophore observed in the respective panel and emphasize the plane of the image. Scale bar, 20  $\mu$ m.

**D**, Interaction occurs between HA-tagged  $K^b$  and  $D^b$ -GFP FHCs (37 °C) but not between HC/ $\beta_2m$  heterodimers (25 °C). Scale bar, 20  $\mu$ m.

**E**, HC/HC interaction does not involve intracellular disulfide bond formation, since the FHCs (37 °C) of HA- $K^b$  and  $K^b$ (C332S)-GFP, which lacks the cytosolic cysteine, interact in the micropattern assay. Scale bar, 20  $\mu$ m.

**F**, B27, but not  $K^b$ , forms covalent dimers. HA- $K^b$  ( $K^b$  in the label) and HA-B\*27:05 (B27) molecules were immunoprecipitated from the lysate of transduced STF1 cells with an anti-HA monoclonal antibody, separated by reducing (+) or nonreducing (–) SDS-PAGE, and monomers (heavy chain) and covalent homodimers as indicated were detected by Western blotting with an anti-HA antiserum. \* denotes a background band.

**G**, No interaction of  $K^b$ -GFP with F-pocket-stabilized HA- $K^b$ (Y84C/A139C), a disulfide-stabilized  $K^b$  variant with increased  $\beta_2m$  affinity. Scale bar, 20  $\mu$ m.

Dirscherl et al., Figure 2

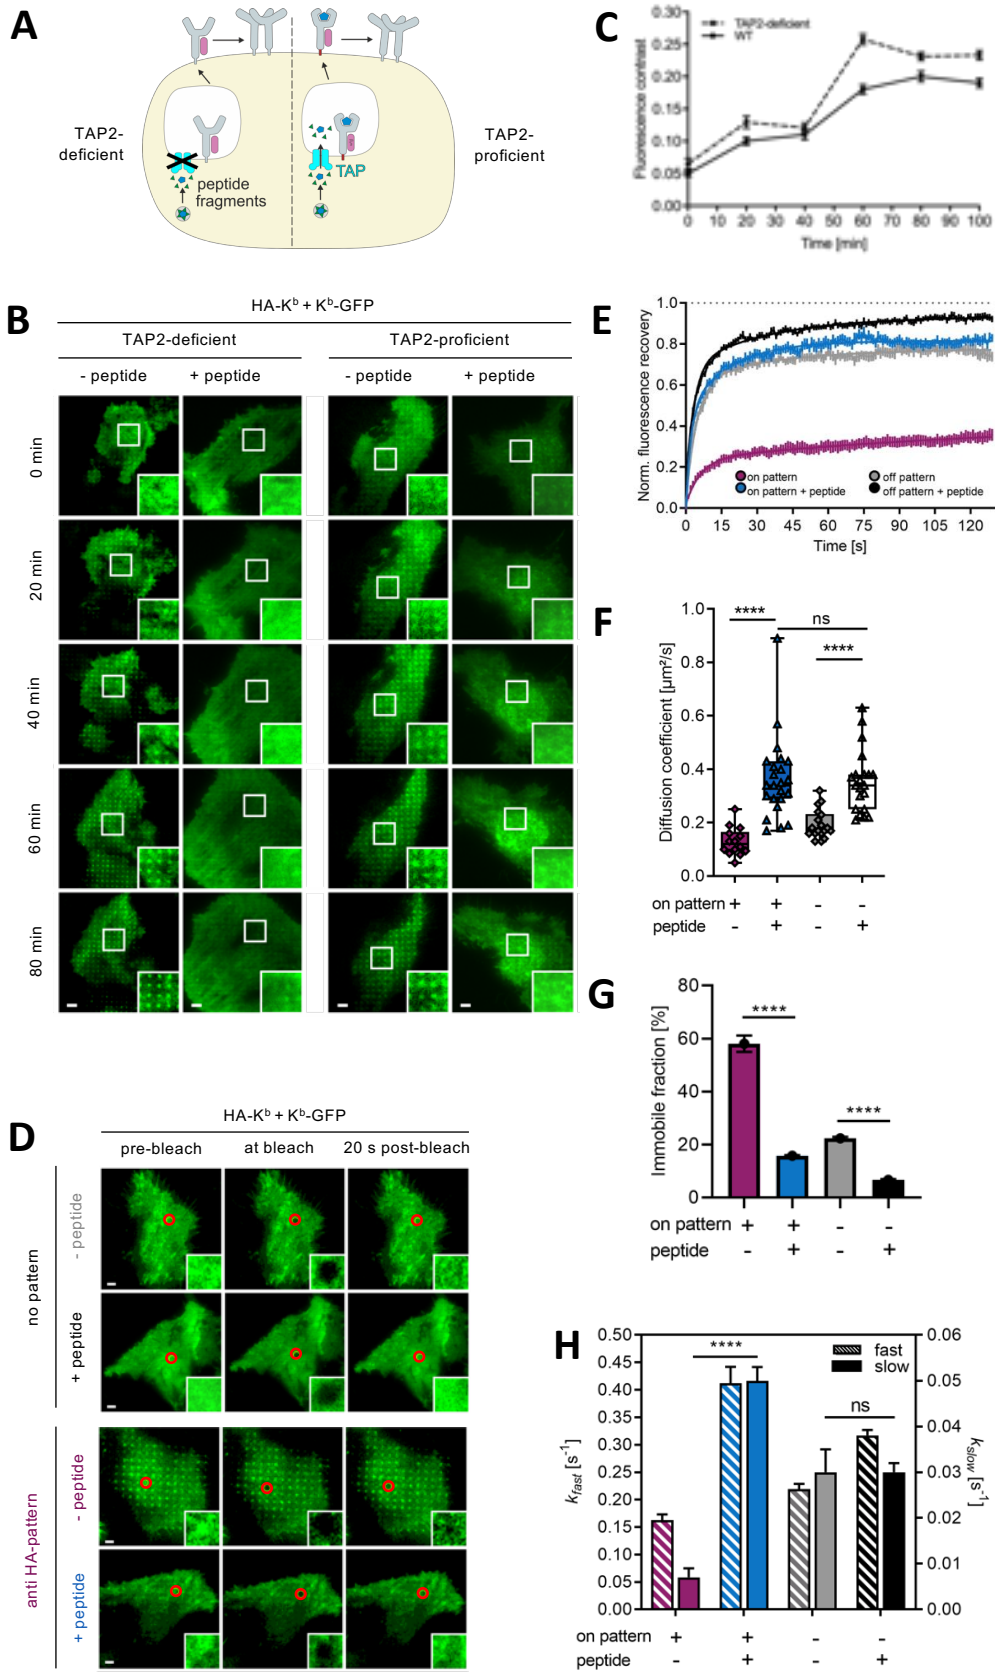

Figure 2: FHCs interact in TAP-proficient cells and in the absence of patterns.  
(continued on next page)



**Figure 2: FHCs interact in TAP2-proficient cells and in the absence of patterns.**

**A**, Schematic of cell surface interaction between FHCs in TAP2-deficient (left) and TAP2-proficient cells.

**B**, Time course of the interaction between HA-K<sup>b</sup> and K<sup>b</sup>-GFP in the anti-HA antibody micropattern assay upon temperature shift from 25 °C to 37 °C in TAP2-proficient (STF1/TAP2, right) and TAP2-deficient cells (STF1, left). Representative TIRF microscopy images are shown. 2 μM of cognate SIINFEKL peptide were added as indicated. Scale bar, 8 μm. Insets show enlarged intensity-adjusted regions within the selected cells.

**C**, Quantification of fluorescence contrast from B. Error bars are standard error of the mean (SEM) of >10 cells measured in ≥2 independent experiments.

**D**, FRAP analysis of K<sup>b</sup> cell surface dynamics. Cells expressing K<sup>b</sup> constructs as in B were monitored in the absence of patterns (top) or on anti-HA antibody patterns (bottom) with or without SIINFEKL peptide as indicated. Regions in the red circle were bleached, and recovery of fluorescence was followed over time. Scale bar, 5 μm. Insets show the enlarged intensity-adjusted region of bleached spot.

**E**, Normalized mean fluorescence recovery curves from FRAP experiments, error bars represent SEM.

**F**, Diffusion coefficients calculated from E. Significant increase in diffusion coefficients upon peptide addition, both in the absence and presence of antibody patterns. \*\*\*\*,  $p \leq 0.0001$  by two-way ANOVA. ns, not significant. Error bars are SEM of >20 cells for each condition measured in ≥2 independent experiments.

**G**, Immobile fraction of K<sup>b</sup>-GFP molecules, i.e. molecules that remain in the bleached area during the time of the experiment. With peptide vs. without peptide \*\*\*\*,  $p \leq 0.0001$  and on pattern vs. in the absence of pattern \*\*\*\*,  $p \leq 0.0001$  by two-way ANOVA. Error bars are SEM of >20 cells for each condition measured in ≥2 independent experiments.

**H**, Exchange rates of K<sup>b</sup> molecules calculated from fluorescence recovery curves.  $k_{fast}$  (left Y axis, hatched bars) is the rate of diffusion of K<sup>b</sup>-GFP molecules.  $k_{slow}$  (right Y axis, solid-color bars) is the rate of K<sup>b</sup>-GFP exchange on (= binding to and dissociation from) HA-K<sup>b</sup>. With peptide vs. without peptide \*\*\*\*,  $p \leq 0.0001$  on anti-HA pattern by two-way ANOVA. Error bars are SEM of >20 cells for each condition measured in ≥2 independent experiments.

Dirscherl *et al.*, Figure 3

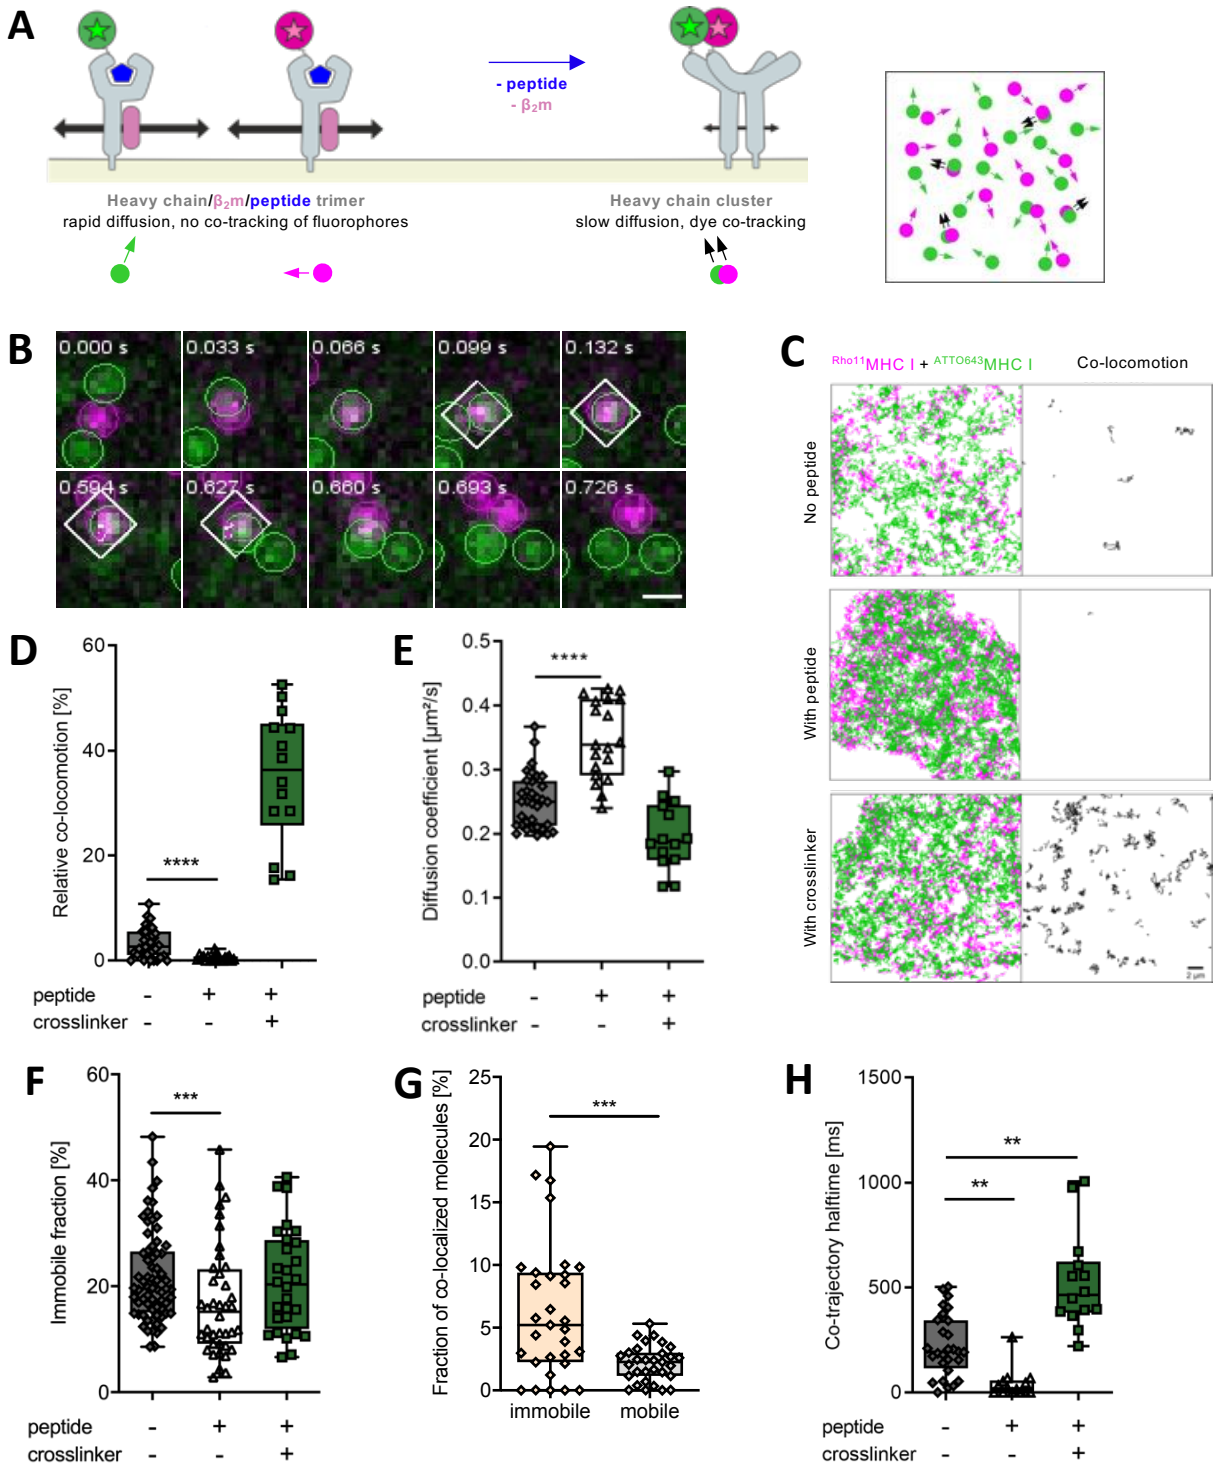

Figure 3: Single-molecule microscopy shows  $K^b$  dimer formation.  
(continued on next page)

**Figure 3: Single-molecule microscopy shows K<sup>b</sup> dimer formation.**

**A**, Schematic on the left: analyzing FHC association by single-molecule microscopy. GFP-K<sup>b</sup> molecules at the plasma membrane were labeled with two different fluorophores (ATTO Rho11, magenta, and ATTO 643, green) using anti-GFP nanobodies, with one GFP molecule binding one nanobody. Diffusion and interaction of individual molecules was quantified by tracking and co-tracking of individual molecules. Right: Top view of the plasma membrane with diffusing and co-diffusing nanobody-labeled GFP-K<sup>b</sup> molecules (corresponding data are shown in **C**).

**B**, Formation and dissociation of an individual GFP-K<sup>b</sup> dimer detected by co-tracking analysis. Co-locomoting molecules are highlighted by a white square. Scale bar, 400 nm.

**C**, Single molecule trajectories (green, magenta) and co-trajectories (black) observed for GFP-K<sup>b</sup> FHCs (no peptide, top) and HC/β<sub>2</sub>m/peptide trimers (With peptide, middle). As a control, the same experiment was carried out after crosslinking peptide-loaded K<sup>b</sup> with a tandem anti-GFP nanobody (With crosslinker, bottom). Scale bar, 2 μm.

**D-H**, statistical analyses by two-sample Kolmogorov-Smirnov test (\*\*\*\*,  $p \leq 0.0001$ ; \*\*\*,  $p \leq 0.001$ ; \*\*,  $p \leq 0.01$ ). Sample numbers see the methods section.

**D**, Fraction of detected co-trajectories out of the total number of observed trajectories for K<sup>b</sup> in the absence and in the presence of peptide and crosslinker as indicated.

**E**, Diffusion coefficients of K<sup>b</sup> molecules determined by single-molecule tracking in the absence and presence of peptide and crosslinker.

**F**, The fraction of immobile molecules out of the total GFP-K<sup>b</sup> surface molecules determined by single-molecule tracking. SIINFEKL peptide and crosslinker were added as indicated.

**G**, Comparison of the fractions of mobile and immobile GFP-K<sup>b</sup> molecules that are associated. The fraction of (associated immobile K<sup>b</sup>)/(total immobile K<sup>b</sup>) is shown vs. the fraction of (associated mobile K<sup>b</sup>)/(total mobile K<sup>b</sup>).

**H**, Quantification of co-trajectory half-life for GFP-K<sup>b</sup> as obtained from single molecule co-trajectories with SIINFEKL peptide and crosslinker as indicated; the dissociation rates calculated from the means are 3.1 (no peptide), 17 (peptide, no crosslinker), and 1.3 s<sup>-1</sup> (with peptide and crosslinker).

# Dirscherl et al., Figure 4

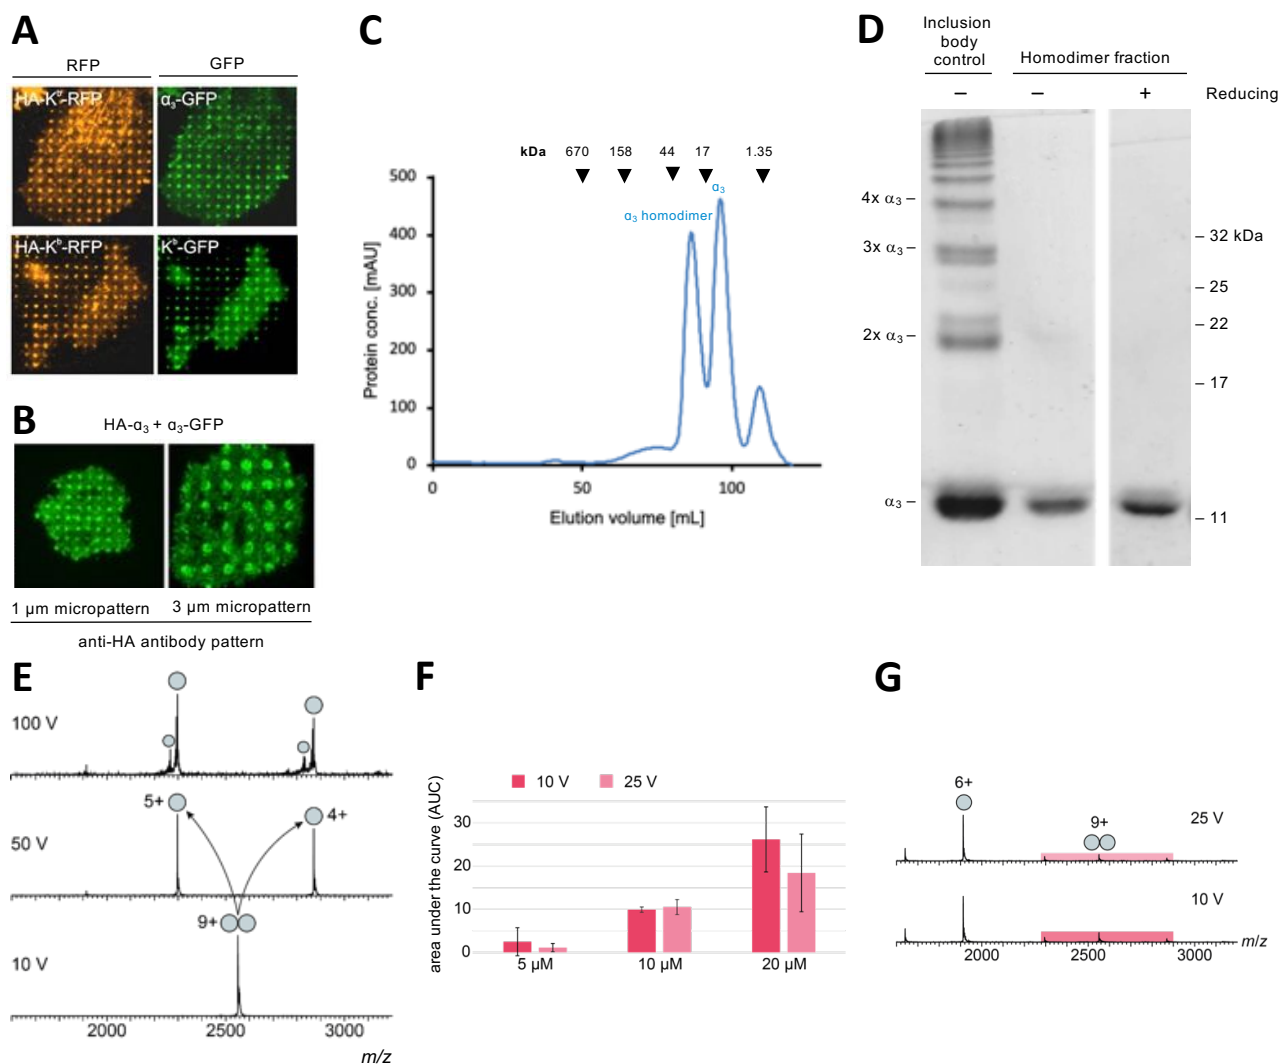

**Figure 4: The K<sup>b</sup>  $\alpha_3$  domains form dimers.**

**A**, HC/HC association between HA-K<sup>b</sup>-RFP and  $\alpha_3$ -GFP. Distance between pattern elements, 2  $\mu\text{m}$ .

**B**, HC/HC association between HA- $\alpha_3$  and  $\alpha_3$ -GFP. Distance between pattern elements, 2  $\mu\text{m}$ .

**C**, Size exclusion chromatography of the K<sup>b</sup>  $\alpha_3$  domain expressed in E.coli and folded in vitro.

**D**, Nonreducing SDS-PAGE of the  $\alpha_3$  domain homodimer fraction from C shows absence of disulfide linkage between the monomers. The positive control for disulfide oligomer formation is  $\alpha_3$  inclusion bodies, isolated under oxidizing conditions, where some molecules are linked by disulfide bonds to form covalent oligomers as indicated on the left.

**E**, MS/MS analysis of the  $\alpha_3$  domain at 10  $\mu\text{M}$ . The 9+ peak at 2551  $m/z$  corresponding to the  $\alpha_3$  dimer was selected for MS/MS analysis at 10 V, 50 V and 100 V in the collision cell. The dimer (double spheres) easily dissociates in the gas-phase indicating a non-covalent rather low-affinity binding event. At 50 V, no dimer is detectable anymore displaced by monomeric signal (single spheres).

**F**, Overall area under the curve (AUC) for the detected  $\alpha_3$  domain dimers. Native mass spectra were recorded using 5  $\mu\text{M}$ , 10  $\mu\text{M}$  or 20  $\mu\text{M}$   $\alpha_3$  domain at 10 V (dark red) and 25 V (light red), respectively. The AUC was determined over the entire spectrum for the dimeric mass species and is shown as mean ( $n=3$ )  $\pm$ SD. The dimeric fraction is concentration-dependent.

**G**, Representative mass spectra (20  $\mu\text{M}$   $\alpha_3$  domain) show the charge distributions of monomer (single sphere) and dimer (double spheres) at 10 V (dark red) and 25 V (light red) in the collision cell.

Dirscherl *et al.*, Figure 5

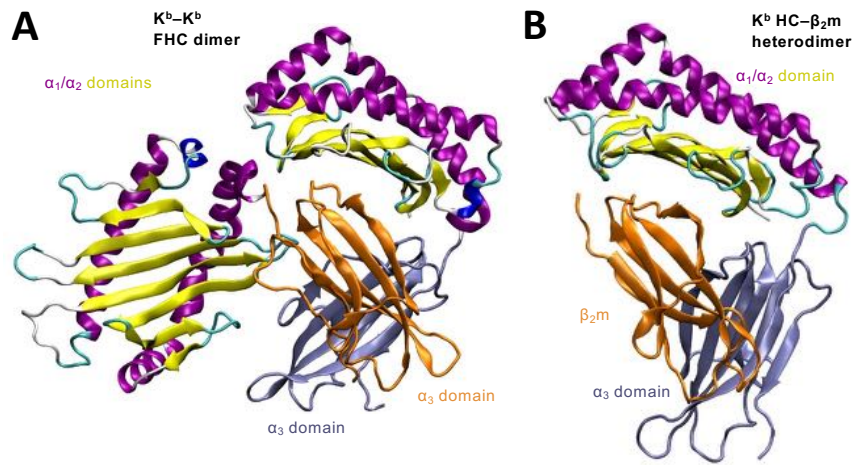

**Figure 5: One hypothetical model of a  $K^b$  FHC dimer.**

In this hypothetical structure of the extracellular portion of an FHC dimer (**A**), one of several structures predicted by computational molecular docking and molecular dynamics simulation, the  $\alpha_3$  domain of one FHC (orange) binds to another FHC (yellow/purple/lavender) in a manner resembling the binding of  $\beta_2m$  in the crystal structure of peptide-loaded  $K^b$  (**B**, PDB 3P9L).

**A**

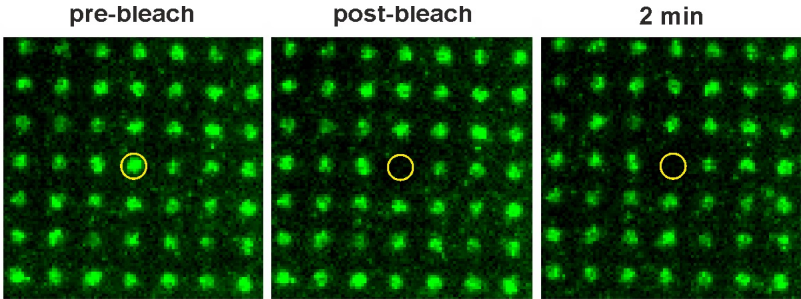

**B**

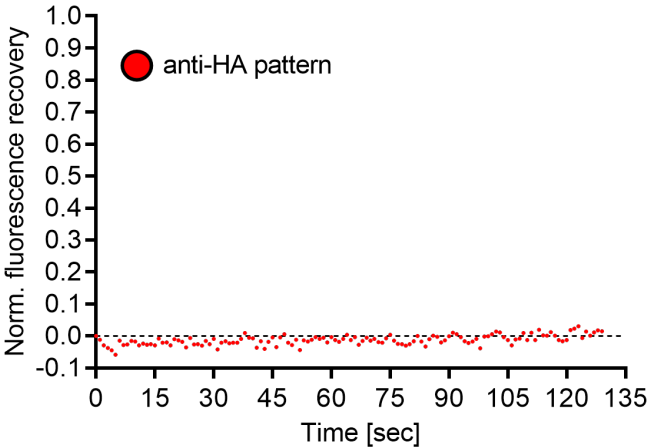

**Figure 2 Supplement 1: Micropattern negative antibody control.**

The fluorescent signal of the bleached area in an Alexa Fluor 488-labeled anti-HA antibody micropattern remains low. A pattern element was bleached (A), and fluorescence recovery was quantified over a time of 2 min (B). Pattern element distance, 2  $\mu$ m.

Dirscherl *et al.*

Figure 2 Supplement 2

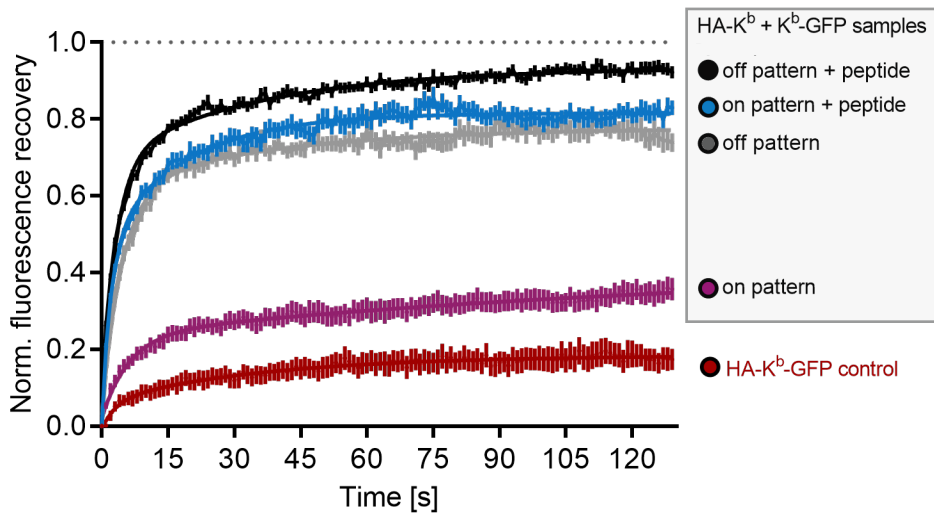

**Figure 2 Supplement 2: Binding and dissociation of HA-K<sup>b</sup>-GFP to and from antibody micropattern is negligible.**

STF1 cells expressing HA-K<sup>b</sup>-GFP (a construct with dual tags: HA at the N terminus, and GFP at the C terminus) were seeded onto anti-HA antibody patterns, GFP was bleached over one pattern element, and fluorescence recovery was measured over time (red curve). The data sets of HA-K<sup>b</sup> + K<sup>b</sup>-GFP samples of Figure 2E with or without peptide are also shown as a comparison. Error bars represent SEM ( $n = 9$  cells for HA-K<sup>b</sup>-GFP cells).

Dirscherl *et al.*

Figure 2 Supplement 3

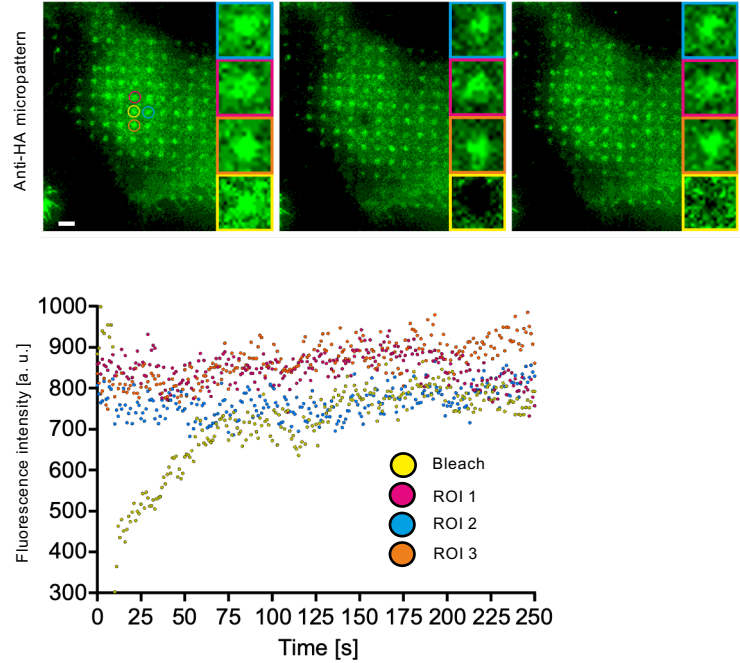

**Figure 2 Supplement 3: Dissociation of K<sup>b</sup>-GFP from micropattern elements is negligible.** GFP bleaching over one pattern element (yellow frame) does not affect the fluorescence of neighboring pattern elements (blue, red, orange frames) over a time period of 250 s.



Dirscherl *et al.*

Figure 3 Supplement 1

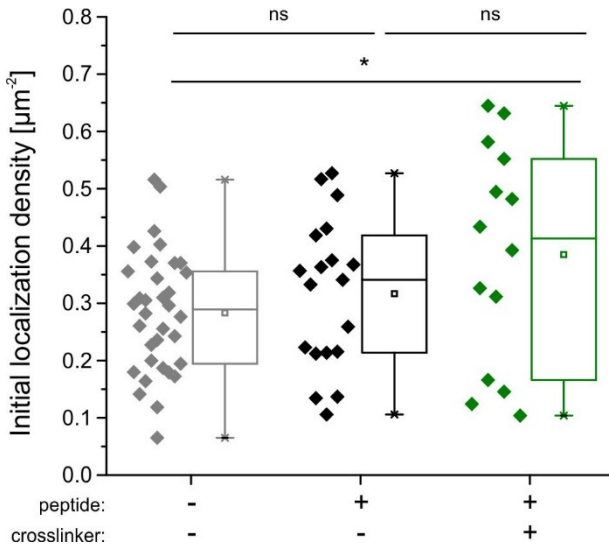

**Figure 3 Supplement 1: Density of molecules in SMT and SMCT experiments.**

Mean initial density of localized GFP-K<sup>b</sup> molecules in each detection channel for the different conditions. Each data point corresponds to the analysis from one single cell with  $\geq 14$  cells measured for each condition.

\*,  $p \leq 0.05$  by a two-sample Kolmogorov-Smirnov test.

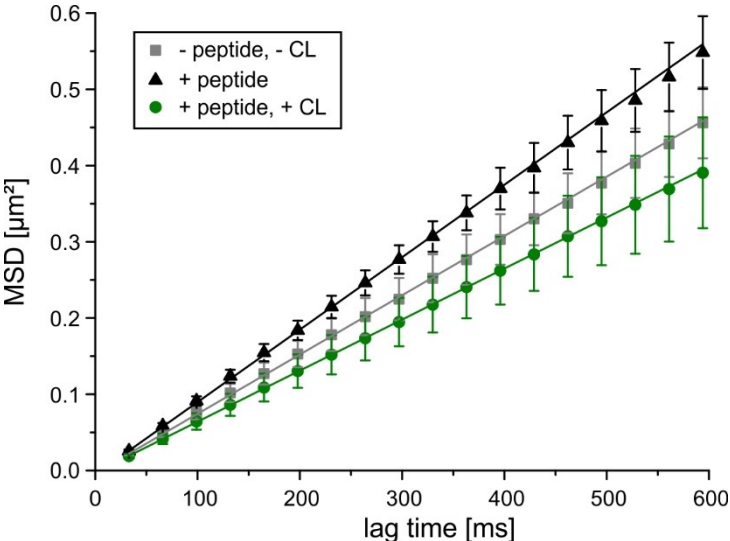

**Figure 3 Supplement 2: Random diffusion of mobile fraction.**

Mean squared displacement (MSD) analysis of GFP-K<sup>b</sup> molecules under different conditions and linear fit. Mean of the MSD values obtained from 10 cells, error bars indicate standard deviations (SD).

Dirscherl *et al.*

Figure 3 Supplement 3

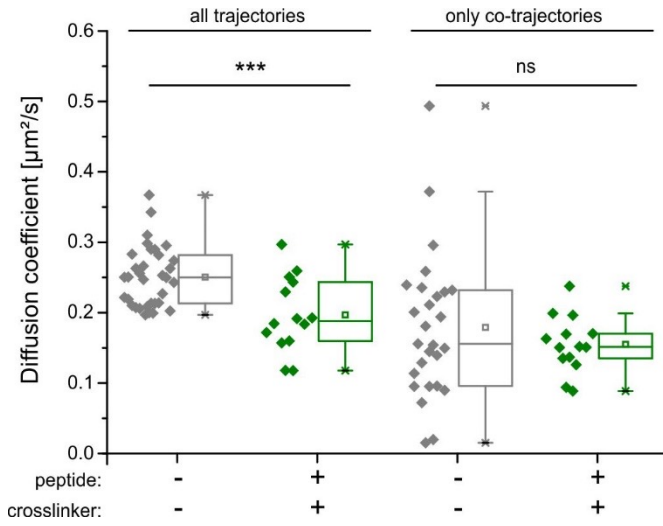

**Figure 3 Supplement 3: Similar diffusion coefficient of FHC and MHC I dimers.**

Comparison of the diffusion constants of the entire mobile fractions and the dimers only for of GFP-K<sup>b</sup> molecules in the absence of peptide and in the presence of peptide and the tandem nanobody crosslinker (CL). \*\*\*,  $p \leq 0.001$  by a two-sample Kolmogorov-Smirnov test.

Dirscherl *et al.*

## Figure 4 Supplement 1

### Figure 4 Supplementary Table 1: Results from native mass spectrometry.

Experimental masses ( $m_{\text{exp}}$ ) of the different  $\alpha_3$  domain protein species were determined from at least three independent mass spectrometry measurements. They are listed together with the respective values for standard deviation (SD) along with the theoretically calculated molecular weight ( $M$ ).

| mass species                        | $M$ [Da] | $M_{\text{exp}}$ [Da] $\pm$ SD |
|-------------------------------------|----------|--------------------------------|
| $\alpha_3$ monomer                  | 11,475   | 11,472.7 $\pm$ 0.4             |
| $\alpha_3$ monomer <sub>short</sub> | 10,623   | 10,0621 $\pm$ 1                |
| $\alpha_3$ dimer                    | 22,950   | 22,947 $\pm$ 1                 |
| $\alpha_3$ dimer <sub>short</sub>   | 22,098   | 22,094 $\pm$ 1                 |

Dirscherl *et al.*

Figure 4 Supplement 2

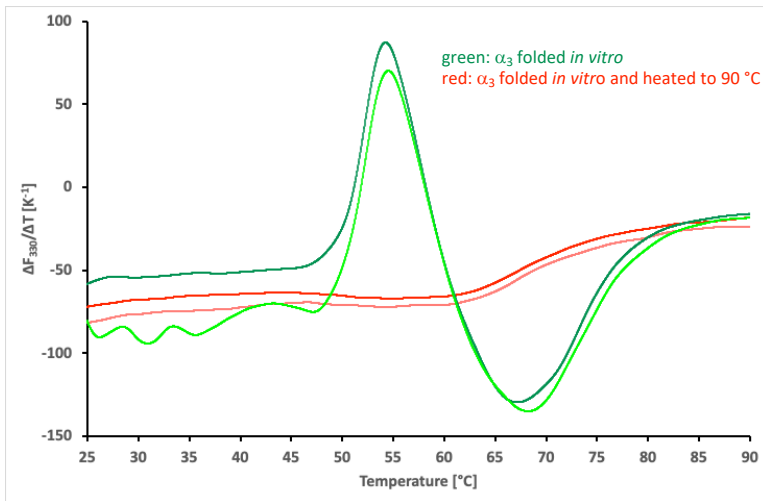

**Figure 5 Supplement 2: Proof of folding of the recombinant  $\alpha_3$  domain.**

The  $\alpha_3$  domain of H-2K<sup>b</sup> was folded *in vitro* for the experiments shown in Figure 4C-G. Aliquots were analyzed by nanoscale differential fluorimetry (nanoDSF): the sample is heated in a capillary from 20 °C to 90 °C, and tryptophan fluorescence is recorded every 0.015 K. Unfolding of the protein breaks up the hydrophobic interior of the protein and removes the tryptophan residues (there are four in the  $\alpha_3$  domain of H-2K<sup>b</sup>) from their native interactions, resulting in a change of the local dielectric constant and thus a change of the wavelengths of the fluorescence maxima and of the intensities of the tryptophans, which are read together by the fluorimeter as a summary signal. The first derivative shows as a peak or valley the midpoint of transition, usually called the melting temperature ( $T_m$ ). In the green curves (representing two technical repeats), a clear melting transition of the  $\alpha_3$  domain is seen with a  $T_m$  of about 54 °C. For the red curves, protein aliquots were heated to 90 °C for 15 minutes before analysis, thus demonstrating the background of unfolded protein in the assay.

Dirscherl *et al.*  
Figure 5 Supplement 1

**A**

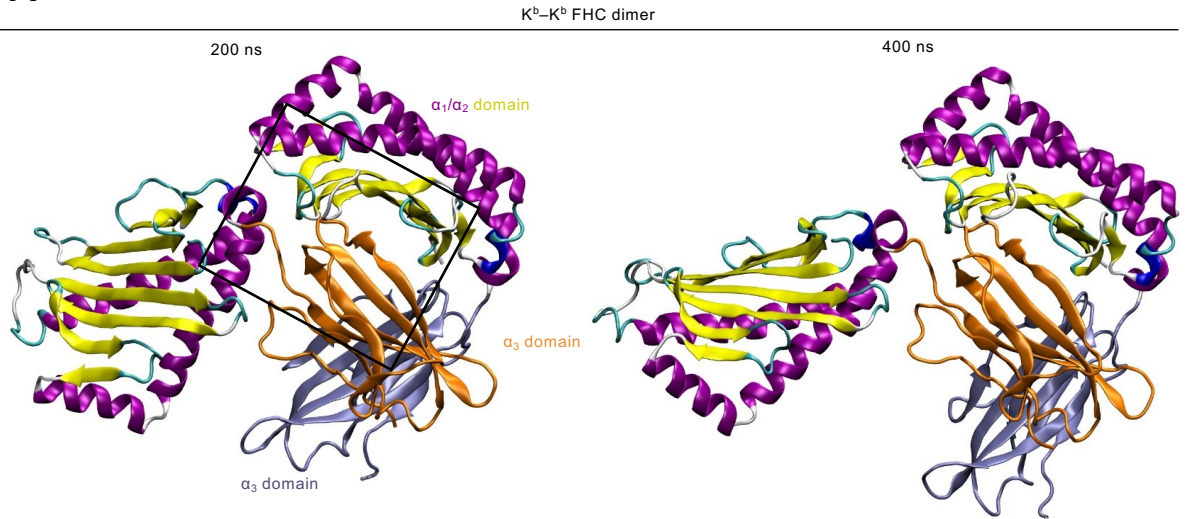

**B**

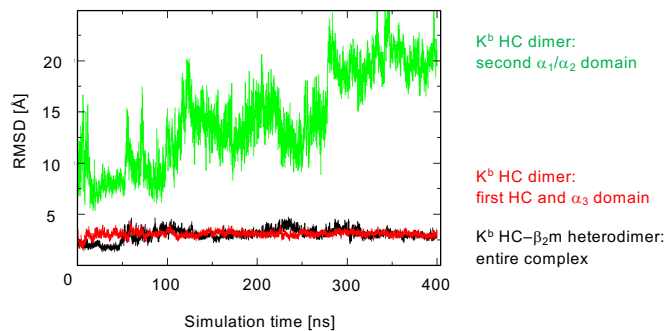

**Figure 5 Supplement 1: MD simulation snapshots of an FHC dimer.**

**A**, The  $\alpha_3$  domain of one K<sup>b</sup> molecule is depicted in orange, the  $\alpha_3$  domain of the other K<sup>b</sup> molecule is depicted in lavender. The  $\alpha_1/\alpha_2$  superdomains are shown in yellow/purple for both FHCs. A favorable interaction of the  $\alpha_3$  domain of one K<sup>b</sup> molecule (orange) with the  $\alpha_1/\alpha_2$  superdomain (yellow/purple) of another K<sup>b</sup> molecule (with  $\alpha_3$  domain in lavender) remains stable after 200 ns (left) and 400 ns (right). The panels represent the conformations sampled at 200 ns and 400 ns time points indicating the exposure and high mobility of the  $\alpha_1/\alpha_2$  superdomain of one of the HCs.

**B**, Root-mean-square deviation (RMSD) of the protein backbone with respect to the starting structure vs. simulation time for the simulation of the K<sup>b</sup> HC/ $\beta_2m$  heterodimer (black line) and for the simulation of the predicted FHC dimer (HC/ $\alpha_3$  domain, red line) is low. In the FHC dimer, the relative mobility of the  $\alpha_1/\alpha_2$  superdomain of the second HC (green line) after superposition of the trajectory on the first HC is high.
